# Supplementary material for: Chemical synthesis and antifouling activity of monoterpene–furan hybrid molecules
Source: Royal Society of Chemistry journal article supplement (doi:10.1039/d2ob02203f), 2022-12-20
Supplement: d2ob02203f1.pdf [file d2ob02203f1.pdf]

## Supplementary Information

Chemical synthesis and antifouling activity of monoterpene–furan hybrid molecules

Hiroyoshi Takamura,<sup>\*a</sup> Yuya Kinoshita,<sup>a</sup> Takefumi Yorisue<sup>b,c</sup> and Isao Kadota<sup>a</sup>

<sup>a</sup> Department of Chemistry, Graduate School of Natural Science and Technology, Okayama University, 3-1-1 Tsushimanaka, Kita-ku, Okayama 700-8530, Japan

<sup>b</sup> Institute of Natural and Environmental Sciences, University of Hyogo, 6 Yayoigaoka, Sanda 669-1546, Japan

<sup>c</sup> Division of Nature and Environmental Management, Museum of Nature and Human Activities, 6 Yayoigaoka, Sanda 669-1546, Japan

takamura@cc.okayama-u.ac.jp

### Table of Contents

|                                                                                                                                                                                                                  |         |
|------------------------------------------------------------------------------------------------------------------------------------------------------------------------------------------------------------------|---------|
| <sup>1</sup> H NMR Spectrum of <b>5</b>                                                                                                                                                                          | S2      |
| <sup>1</sup> H and <sup>13</sup> C NMR Spectra of <b>4a</b>                                                                                                                                                      | S3–S4   |
| <sup>1</sup> H and <sup>13</sup> C NMR and NOE Spectra of <b>4b</b>                                                                                                                                              | S5–S7   |
| <sup>1</sup> H and <sup>13</sup> C NMR Spectra of <b>4c</b>                                                                                                                                                      | S8–S9   |
| <sup>1</sup> H NMR Spectrum of <b>8</b>                                                                                                                                                                          | S10     |
| <sup>1</sup> H and <sup>13</sup> C NMR Spectra of <b>4d</b>                                                                                                                                                      | S11–S12 |
| <sup>1</sup> H and <sup>13</sup> C NMR and NOE Spectra of <b>4e</b>                                                                                                                                              | S13–S15 |
| <sup>1</sup> H and <sup>13</sup> C NMR Spectra of <b>4f</b>                                                                                                                                                      | S16–S17 |
| <sup>1</sup> H and <sup>13</sup> C NMR and NOE Spectra of <b>4g</b>                                                                                                                                              | S18–S20 |
| <sup>1</sup> H NMR Spectrum of <b>11</b>                                                                                                                                                                         | S21     |
| Effects of CuSO <sub>4</sub> , Geraniol ( <b>1</b> ), ( <i>S</i> )-Citronellol ( <b>10</b> ), Furan <b>12</b> ,<br>and Hybrid Molecules <b>4a–4i</b> on Settlement and Mortality of Cypris Larvae<br>(Figure S1) | S22–S26 |

FILE YK1-20.als  
 COM1  
 DATE Mon Jun 04 17:20:34 2018  
 TIME 17:24  
 NAME YK1  
 EXPNO 1  
 PROCNO 1  
 OBSFQ 399.65 MHz  
 OBSRT 124.00 kHz  
 F1 10537.68 Hz  
 POINT 1  
 FREQ 7993.60 Hz  
 ACQMS  
 ACQON 4.0893 sec  
 PD 2.9010 sec  
 PULPROG zgpg30  
 PRG 6.40 usec  
 CTMP 25.8 C  
 SLVNT CDCL3  
 SREF 7.26 ppm  
 RF 0.12 Hz  
 RGAIN 0.21

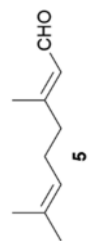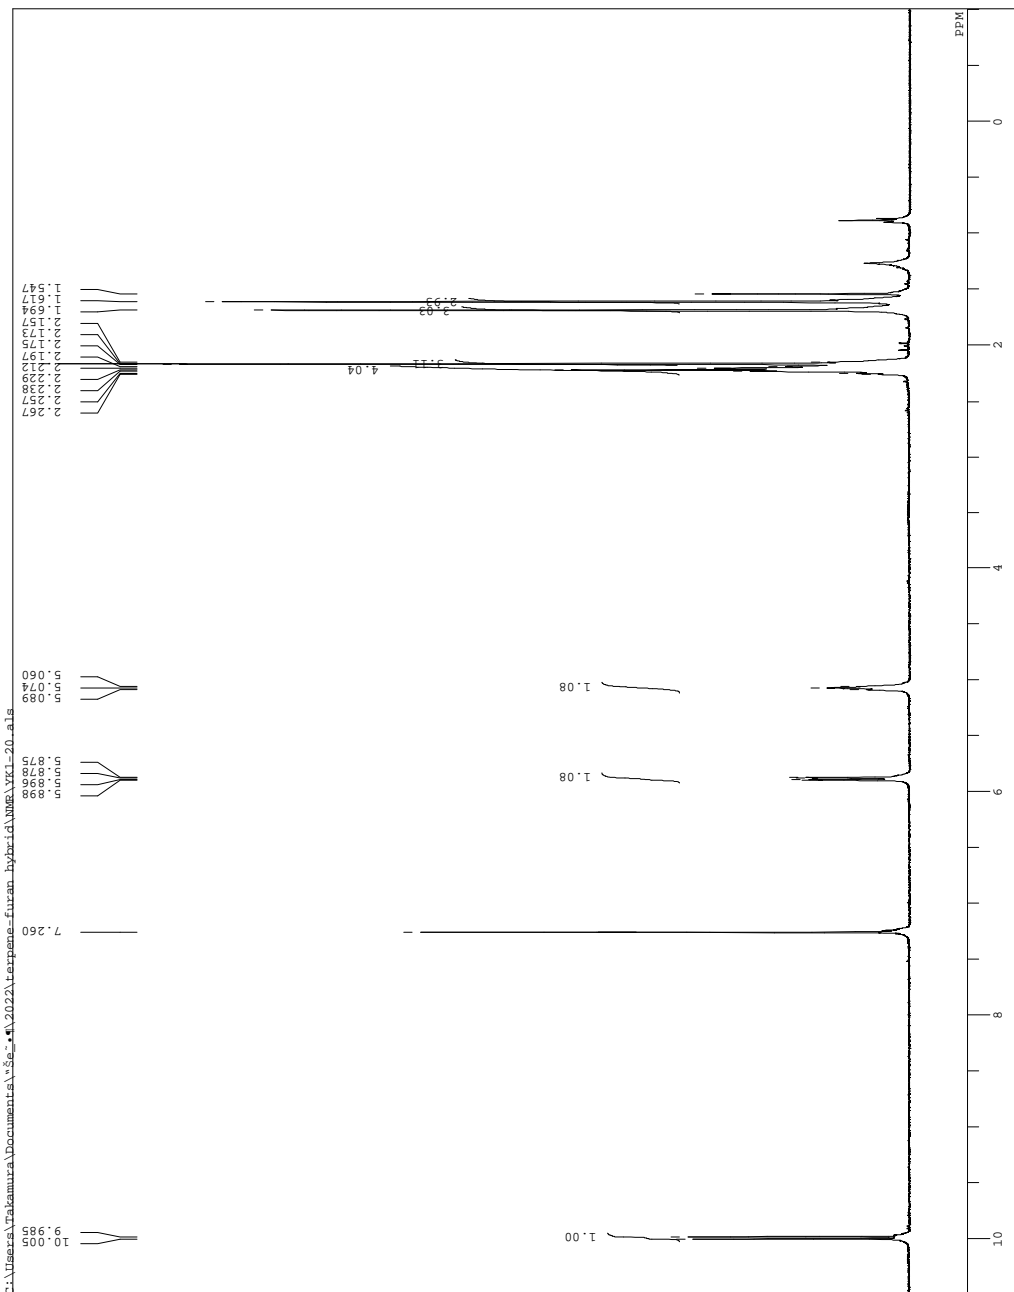

```

DRIFL YK1-58.a.1s
COMPT Wed Oct 10 22:02:54 2018
DATE
TIME
VOP
EXMOD NDN
OBFRQ 399.65 MHz
OBSAT 224.00 KHz
POINT 1052768 Hz
FREQ 7993.60 Hz
ACQMS
ACQMS 4.0993 sec
P.D. 2.9010 sec
INTEG 6.40 usec
INTEG 1H 26.0 c
SOLVENT CDCl3
PULSE BF 7.26 ppm
RGAIN 0.12 Hz
      21
  
```

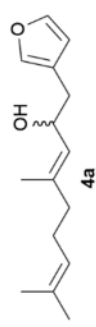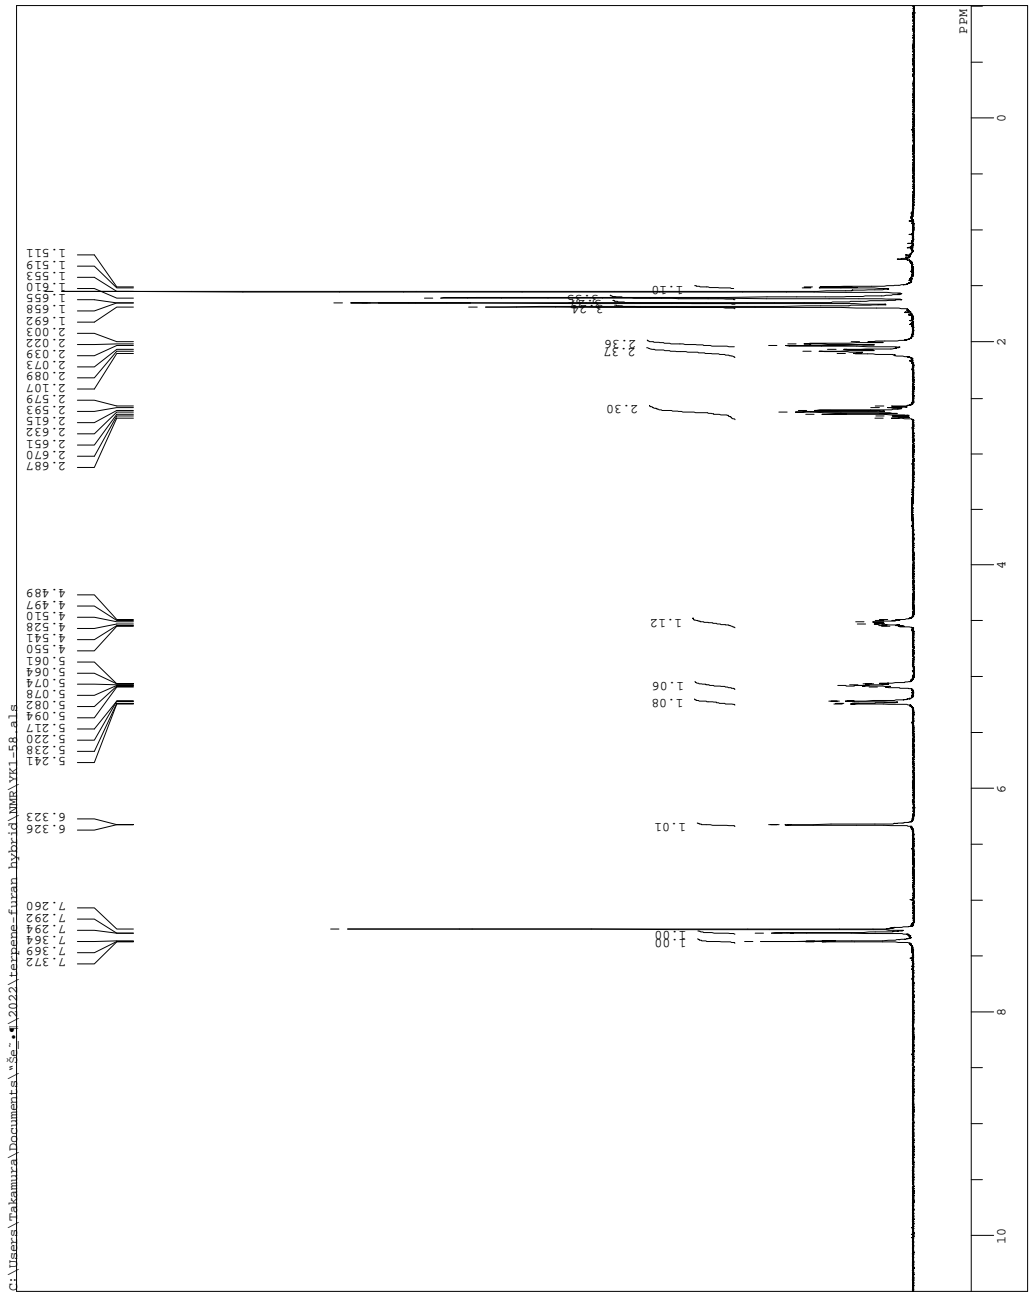

C:\Users\Takahara\Documents\18-4\2022\terpene-fuzan\_hybrid\NMR\YK1-58\_13c\_als

DEFILE YK1-58\_13c\_als  
COMNT Sat Oct 13 10:47:27 2018  
DATEM  
TIME 11:46  
EXMOD BOM  
ORFQ 100.40 MHz  
ORFZ 10500.00 Hz  
ORFN 32768  
POINT 27117.480 Hz  
RANG 1.2055 sec  
ACQTM 1.7940 sec  
PD 6.80 usec  
INMUC 1H  
INMUC 27.7 c  
CTEMP CDCl3  
EXGFB 77.00 PPM  
BF 2.00 Hz  
RGAIN 24

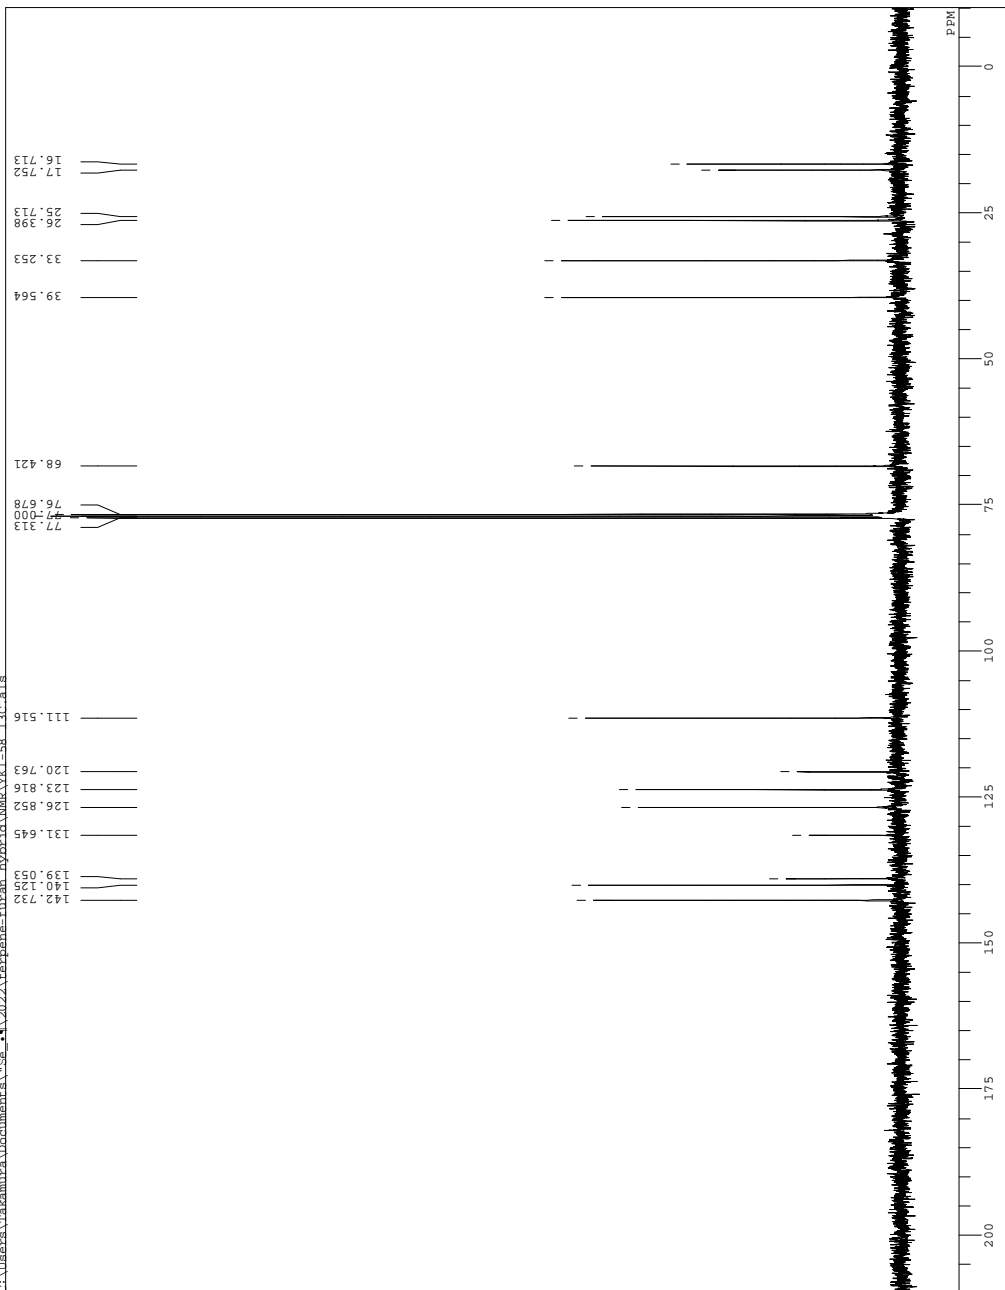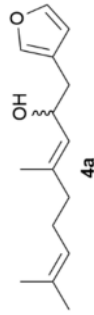

C:\Users\Takamura\Documents\Se\_1\2022\terpene-furan\_hybrid\NMR\SY-412\terpene-als  
 FILE SY-412\terpene-als  
 F2  
 DATE\_ 2022-12-14 11:12:50  
 DATIM H1  
 OBNTC H1  
 XPRF 0  
 PULPROG zgpg30  
 SFO s2pul  
 OSF2 399.91 MHz  
 OSF1 1.99 KHz  
 F2 320.0 Hz  
 F1 6410.26 Hz  
 SCA NS  
 SCANS 32  
 PD 1.500 sec  
 PDS 1.500 sec  
 PWD 7.15 usec  
 PWT 37.0 C  
 TEMPC  
 CREF  
 SLVNT cdcl3  
 EXREF 7.26 PPM  
 RGAIN 0.48

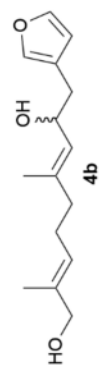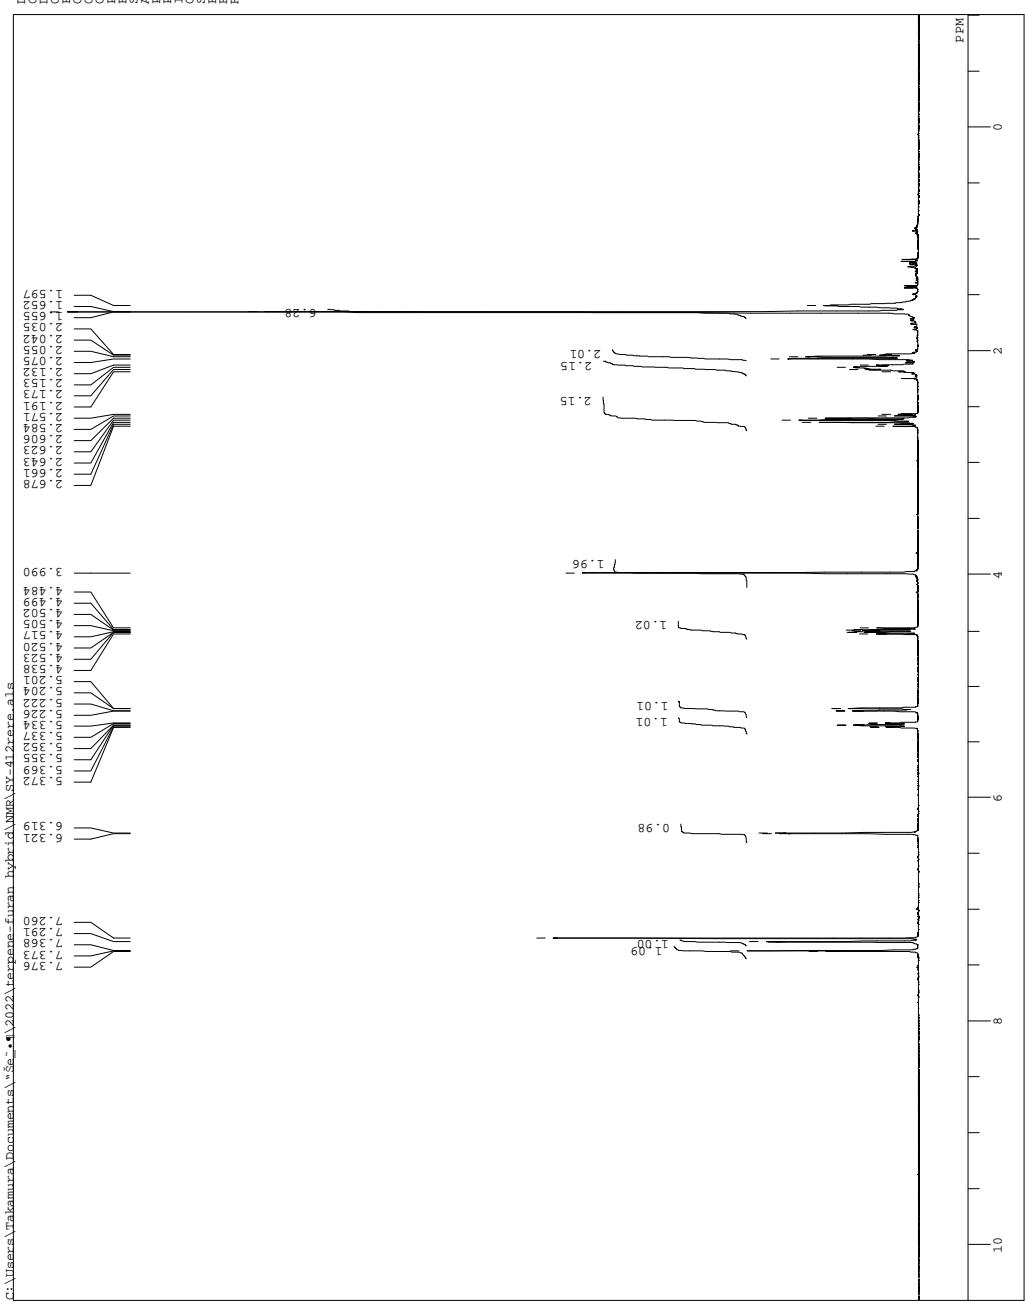

D:\Users\takamura\Documents\5g-4\2022A\terpene-furan\_hybrid\NMR\YK1-56-3 13C.als  
 DATEM Tue Oct 16 18:18:23 2018  
 OBNUC 13C  
 XPRD BCM  
 XREF  
 OBSFT 100.40 MHz  
 OBSFQ 125.00 MHz  
 OBSFN 10500.00 Hz  
 P1 1.700 sec  
 PRNU 27173.90 Hz  
 FREQ 430  
 SCANS 1.700 sec  
 PDQT 6.80 usec  
 FWH  
 LRNUC 1H 27.9 C  
 SLVNT CDCL3 77.00 ppm  
 EXREF  
 RGAIN 2.20 Hz

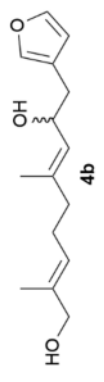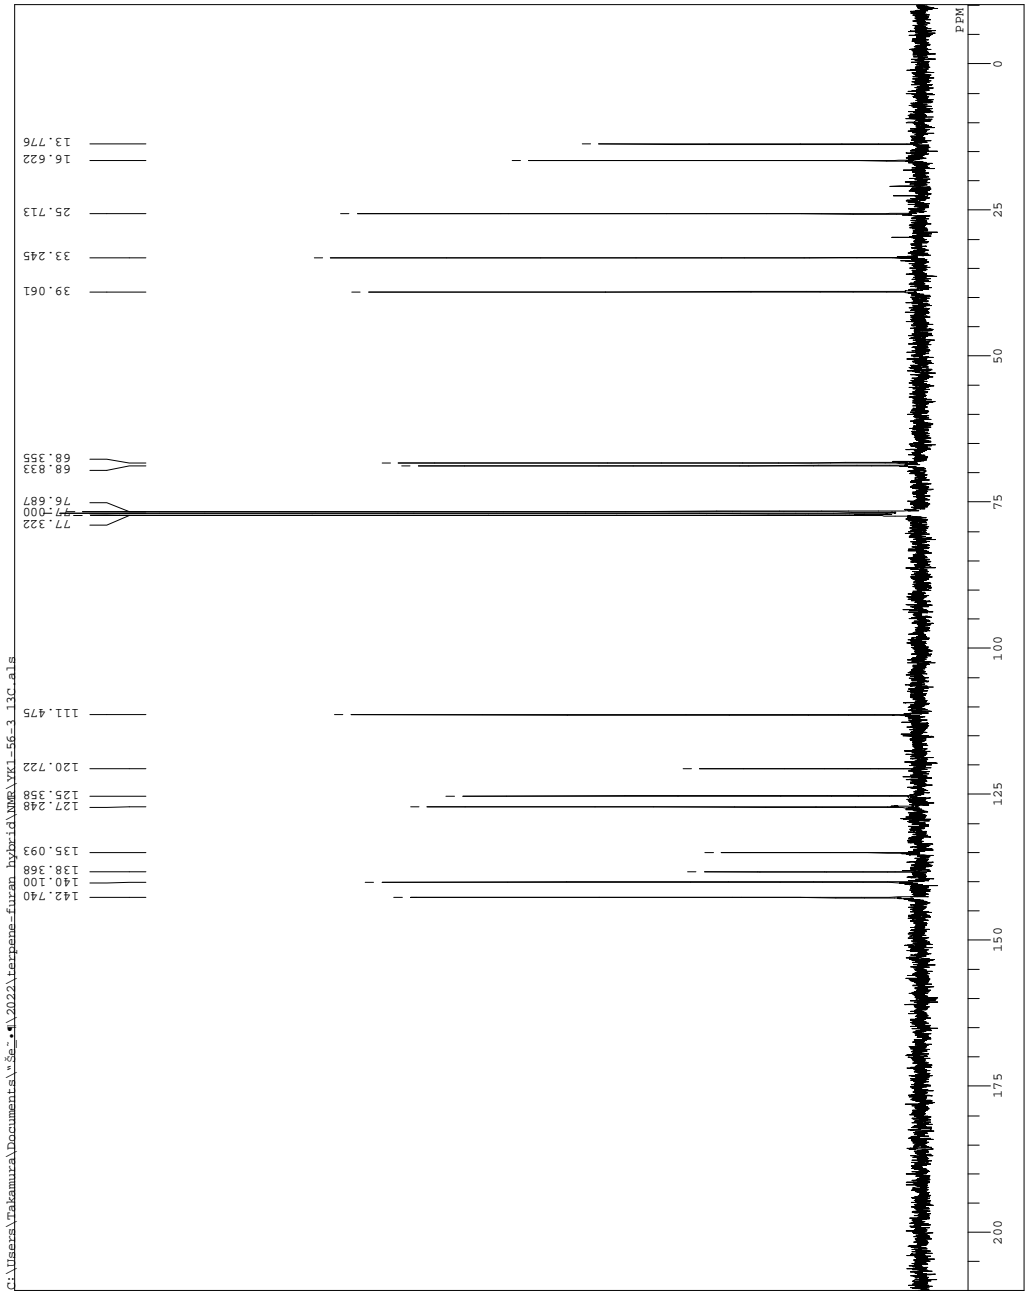

C:\Users\takamura\Documents\Se\_4\2022\ terpene-furan\_hybrid\NMR\YK1-29-2\_NOE.als

DETE YK1-29-2 NOE.als  
DATE Tue Jun 19 16:29:41 2018  
NAME H  
PULSE PROGRAM DEFNOE  
PROBHD 5  
PULPROG zgpg30  
ORFREQ 399.65 MHz  
OBSF1 400.138 MHz  
OBSF2 105.32768 MHz  
POINT 1  
FREQ0 7993.60 Hz  
ACQTM 4.0993 sec  
PD 5.0000 sec  
INSTRUM spect  
MVIC 1H  
TEMP 25.9 c  
SOLVENT CDCL3  
SOLNT CDCL3  
RF 7.26 MHz  
BF 0.12 Hz  
RGAIN 20

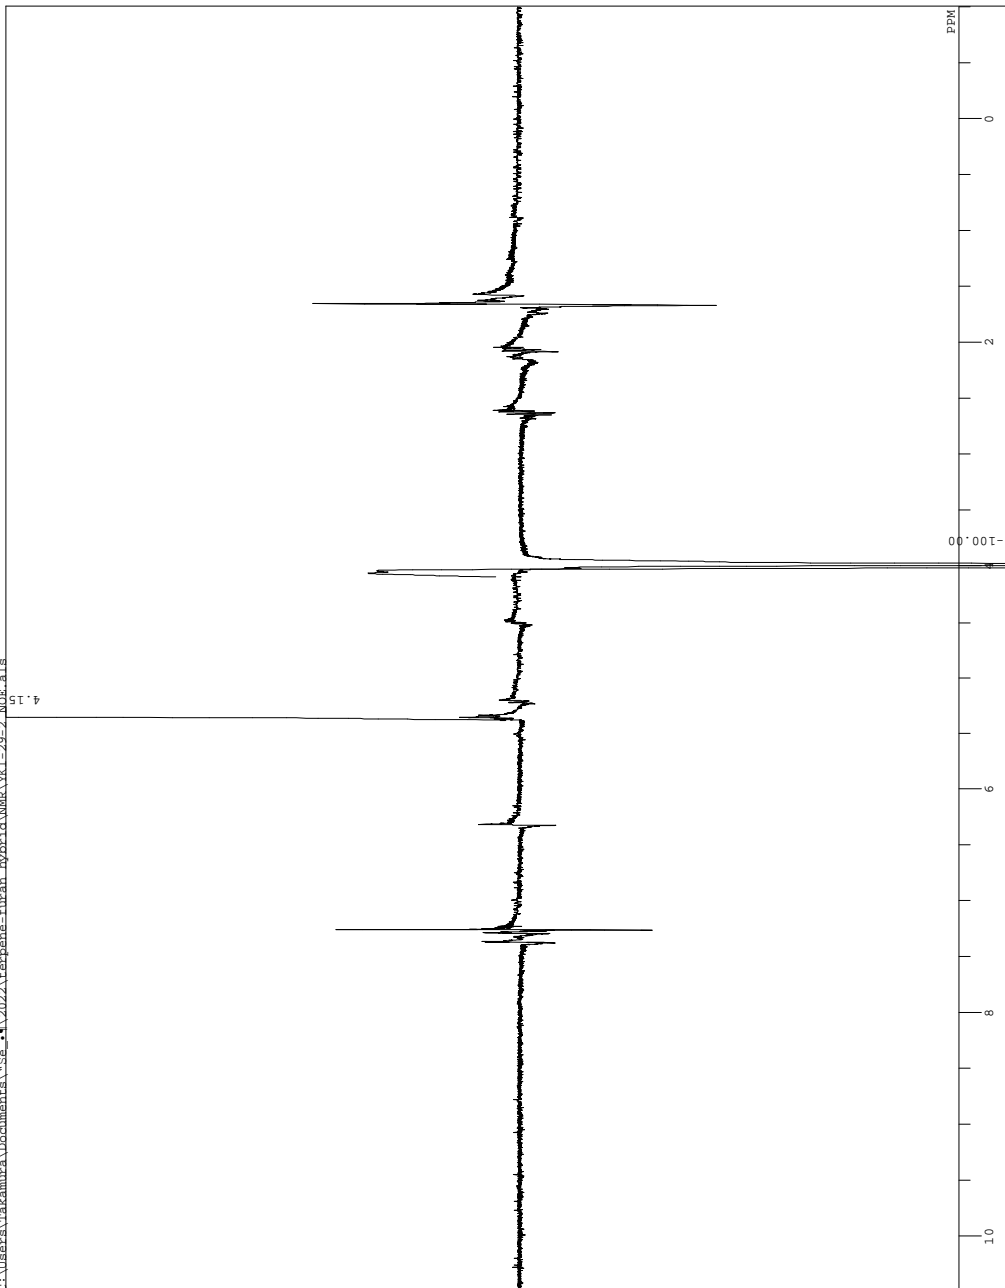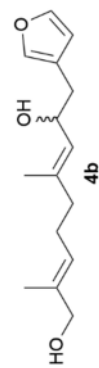

C:\Users\Takamura\Documents\se\*\2022\terpan-furan\_hybrid\NMR\KH-76\_als  
 FILE KH-76.als  
 COMPT KH-75-1  
 DATE 01-19-06-05 15:40:04  
 ORNTC H  
 ORNTS 2  
 EXMOD s2pul 399.81 MHz  
 OBSFQ 1.95 MHz  
 OBSPT 2.00 Hz  
 POINT 6410.32 Hz  
 PULPROG zgpg30  
 SCANS 3  
 ACQTM 3.5000 sec  
 DELT 1.7500 usec  
 PUL 1.7500 usec  
 IRNUC  
 STPM cdc13 30.0 c  
 EXREF 7.26 ppm  
 BF 0.12 Hz  
 RGAIN

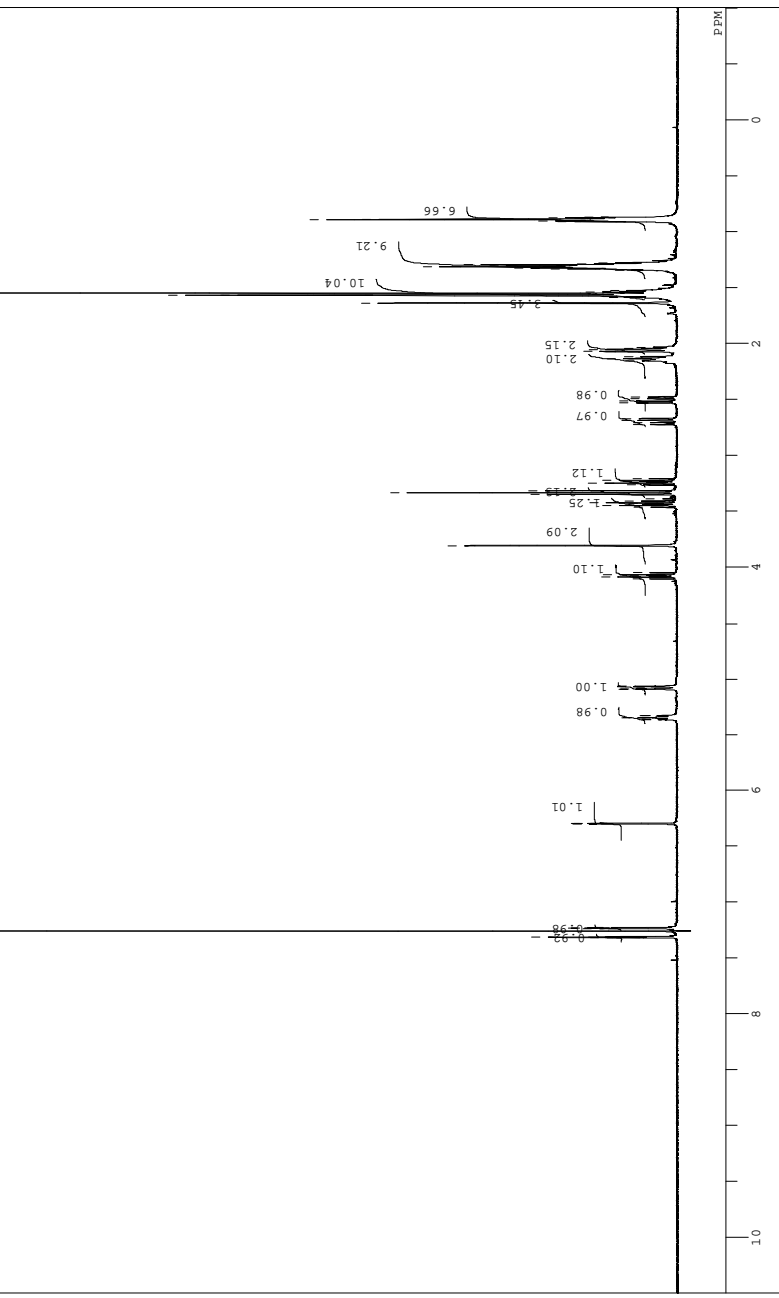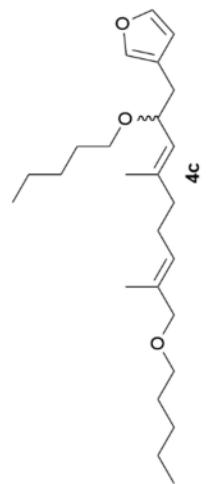



C:\Users\takamura\Documents\Se...1\2022\terpene-furan\_hybrid\NMR\KH-76\_13c\_als

DATE KH-76\_13c\_als  
COMPT 2019-06-08 14:09:22  
DATIM 2019-06-08 14:09:22  
EXMOD s2pul  
OBSFQ 100.56 MHz  
OBSF2 8.30 KHz  
OBSF1 8.30 KHz  
PULPROG zgpg30  
PROBHD 5 mm QNP 1H/13  
FREQ 25000.00 Hz  
NUC1 13C  
NUC2 13C  
ACQTM 1.3187 sec  
PD 5.75 usec  
T1 30.0 c  
T2 30.0 c  
TE 30.0 c  
SOLVENT cdcl3  
SOLWT 77.00 ppm  
SOLBSF 0.12 Hz  
RGAIN 60

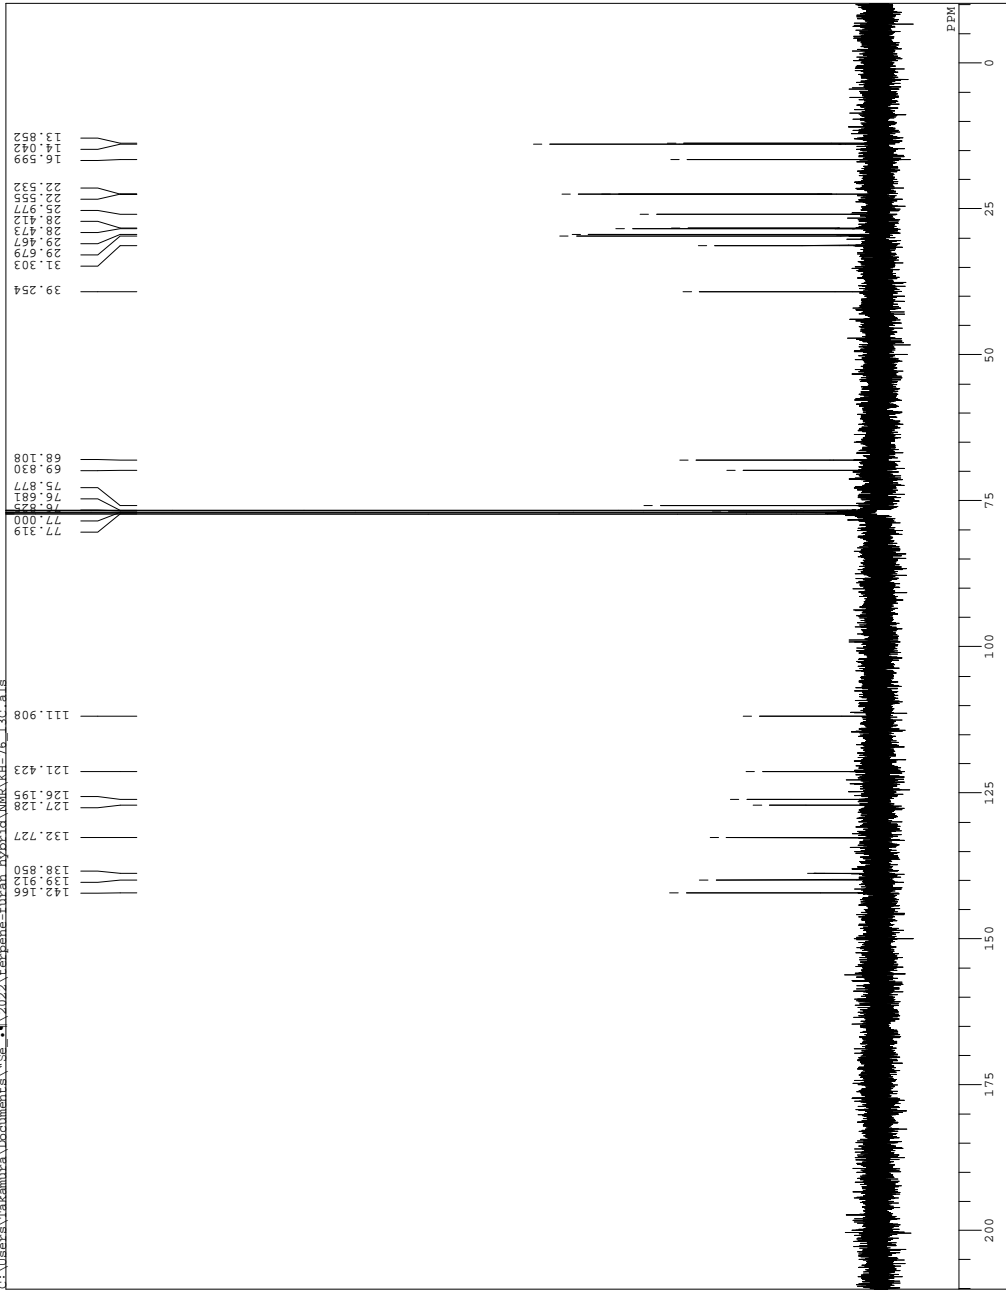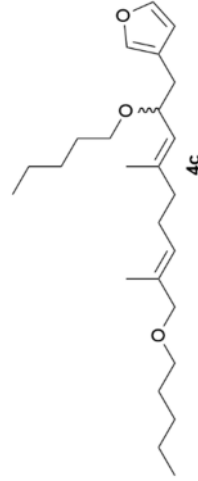

C:\Users\Takanura\Documents\2022\terpene-furan\_hybrid\NMR\VK1-46.a1s  
 D:\Users\Takanura\Documents\2022\terpene-furan\_hybrid\NMR\VK1-46.a1s  
 FILE VK1-46.a1s  
 COMPT F1 Sep 21 21:33:12 2018  
 DATE F1  
 EXMOD NON  
 OBFRQ 399.65 MHz  
 OBSFQ 1050.00 Hz  
 POINT 32768  
 SCANS 7993.68 Hz  
 ACQTM 4.0993 sec  
 PD 2.9010 sec  
 P1 6.40 usec  
 IRRUC 1H 27.3 c  
 CTMP CDCL3  
 EXREF BF 7.26 ppm  
 BF 0.12 Hz  
 RGAIN 20

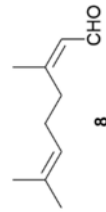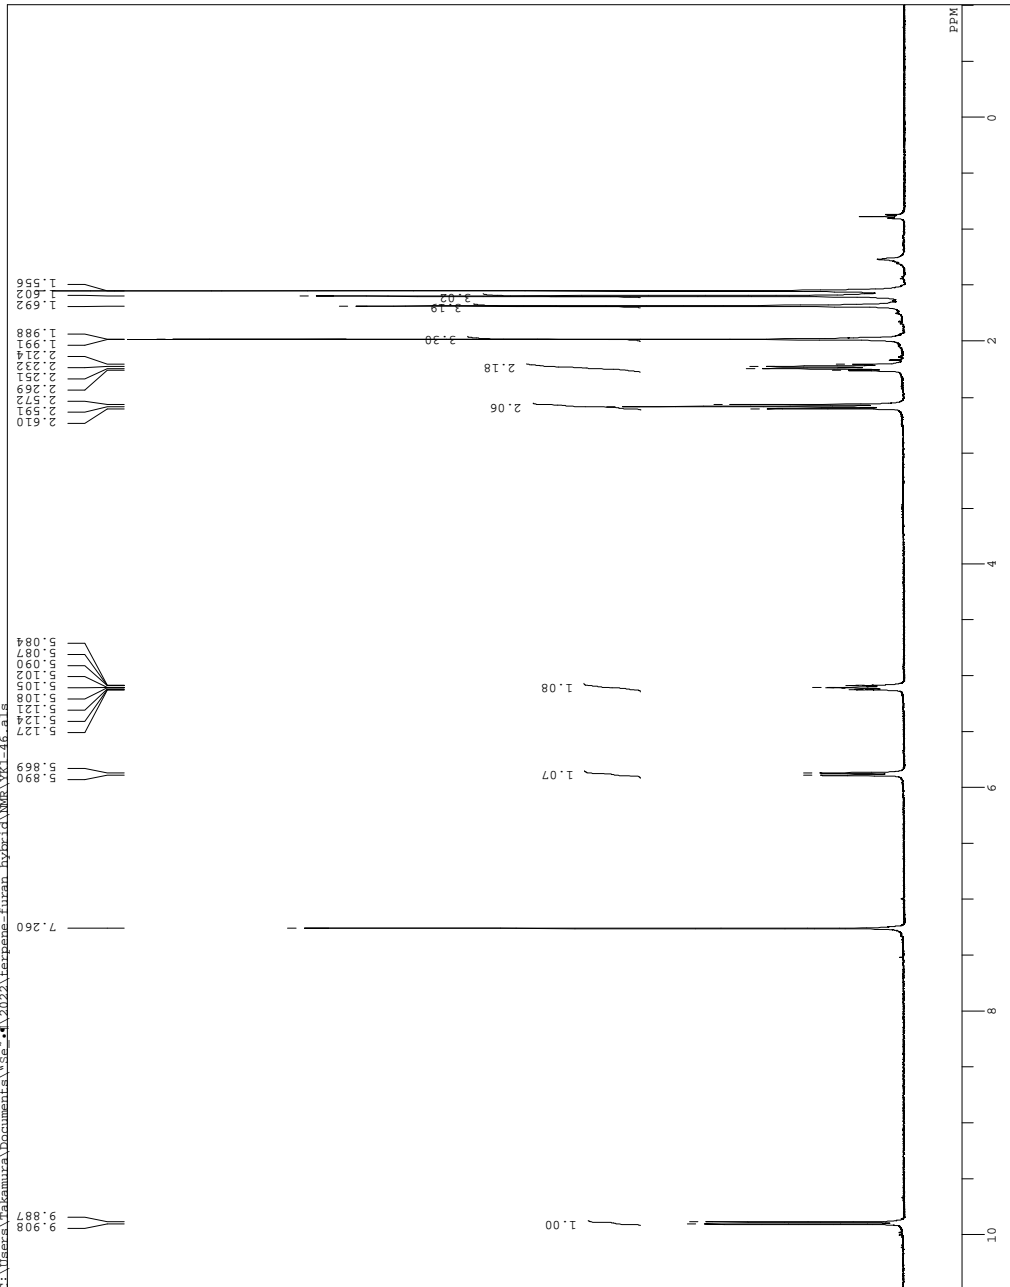

DFILF SY-413.als  
 COMPT 2022-12-14 16:09:58  
 OBNUC H1  
 EXMOD s2pul  
 OBSAQ 399.91 MHz  
 OBSFQ 1.93 MHz  
 OFEIN 2.00 Hz  
 FIDIN 6427.8 Hz  
 FIDIN 6410.32 Hz  
 SCANS 3.5000 sec  
 ACQTM 1.7015 usec  
 PUL 1.7015 usec  
 IRNUC 37.0 c  
 STANT cdcl3 7.26 ppm  
 EXREF 0.12 Hz  
 BF 4.2 Hz  
 RGAIN

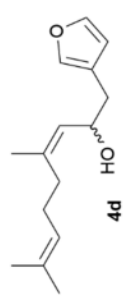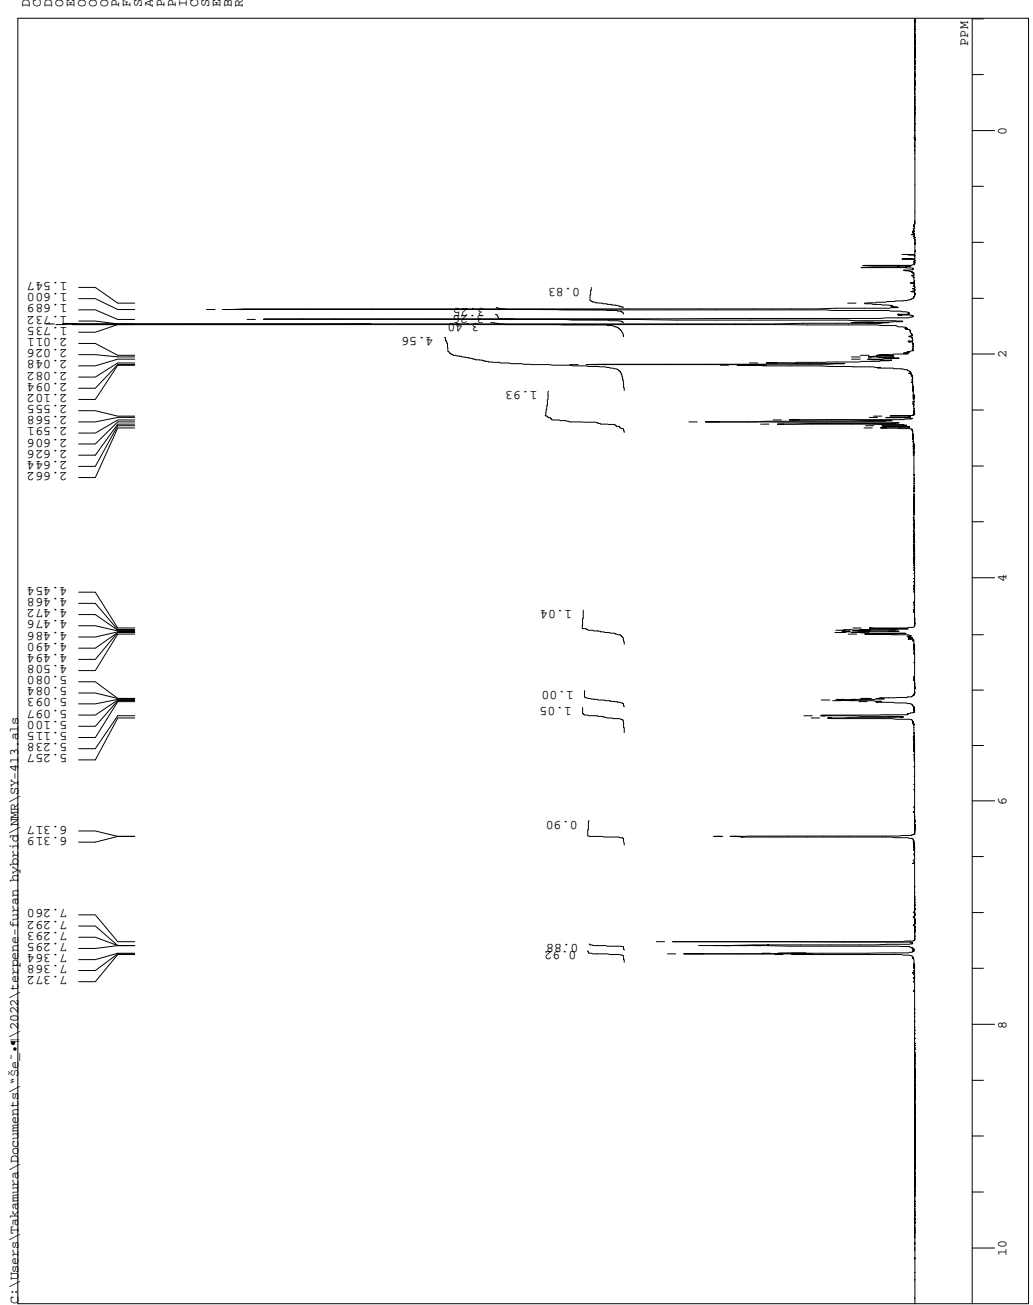

C:\Users\takamura\Documents\5e\_4\2022\terpene-furan\_hybrid\NMR\k1-61\_13c\_als  
 DPFILE k1-61\_13c\_als  
 DATIN Tue Oct 16 20:13:25 2018  
 OBNUC 13C  
 P1 100.00 MHz  
 OBSF1 125.00 KHz  
 OBSF2 10500.00 Hz  
 FREQ1 27173.96 Hz  
 SCANS 320  
 AQC 1.200 sec  
 PD 1.640 usec  
 PULPROG zgpg30  
 LRENOC 1H 27.7 C  
 SLSVNT CDCL3 77.00 PPM  
 EXREF 2.24 Hz  
 RGAIN

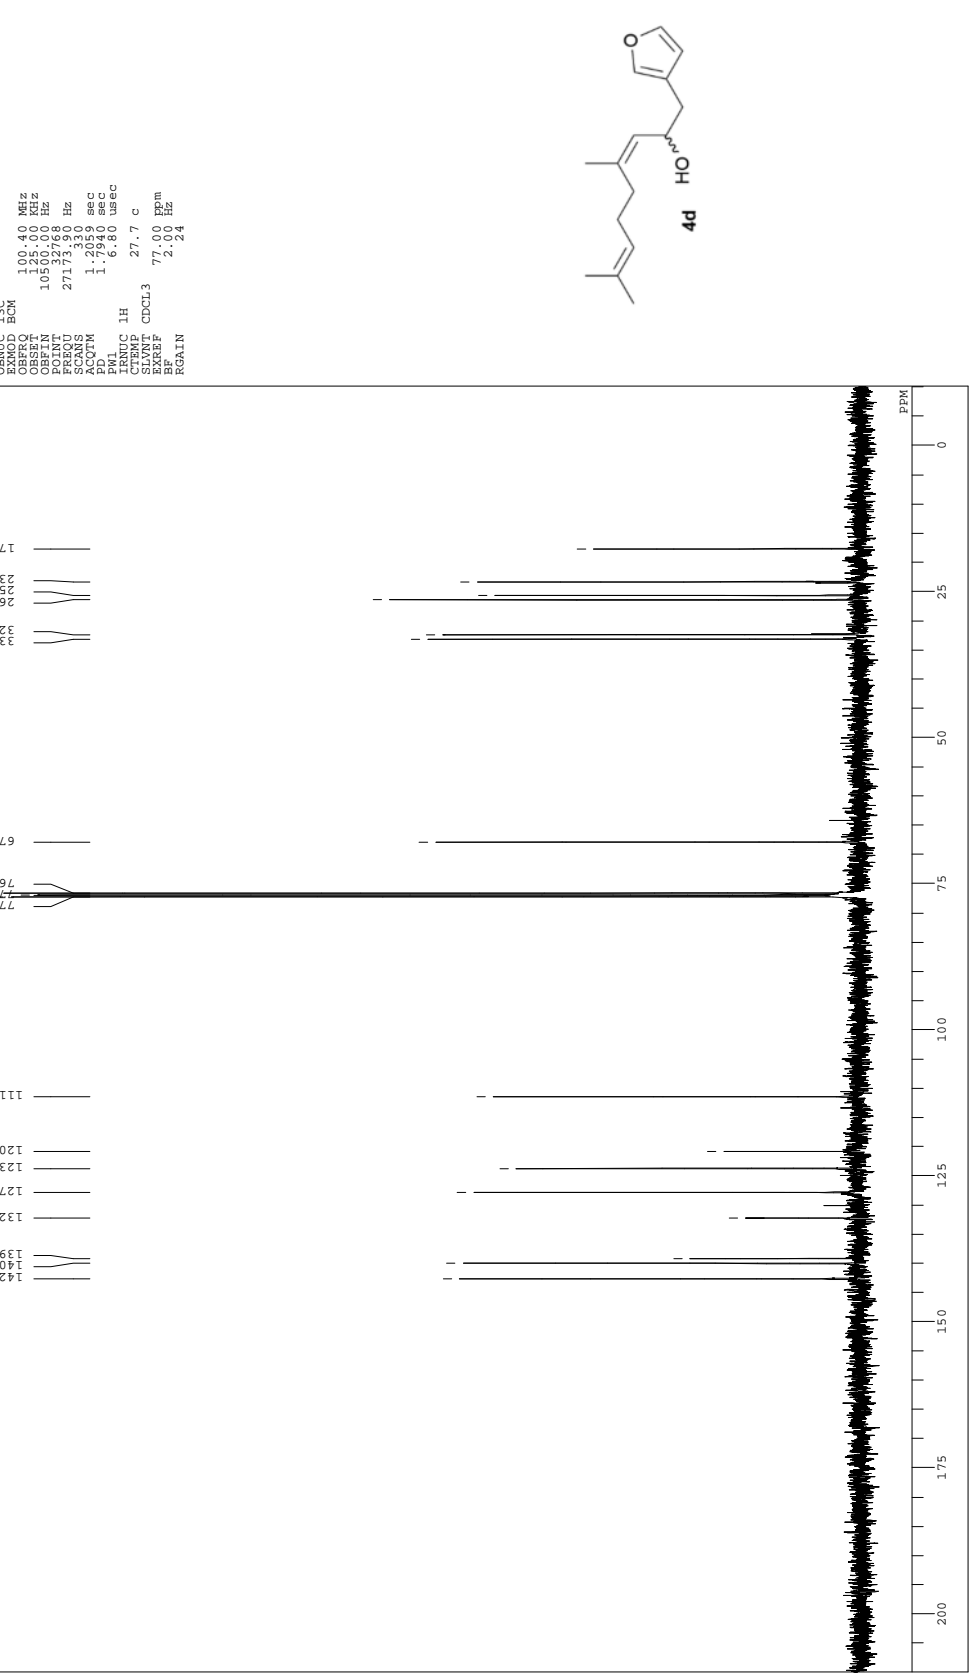

C:\Users\Takanura\Documents\NMR\NMR\VK1-53-2\_als  
 FILE VK1-53-2\_als  
 DATE Mon Oct 15 21:48:08 2018  
 ORBIT 1H  
 PULSE prog  
 PROC NO  
 APROG NON  
 ORBIT 399.65 MHz  
 OBSERVE 134.00 KHz  
 OFFSET 1.0590100 Hz  
 DECOUPLE 79831.60 Hz  
 FREQ0 79831.60 Hz  
 SCANS 4.0898  
 SCA1 2.9010 sec  
 PL1 6.40 usec  
 PL2  
 PL3  
 PWR 1H  
 ATTEM 25.8 C  
 ALPH  
 SLVNT CDCL3  
 EXREF 7.26 ppm  
 RGAIN 0.17

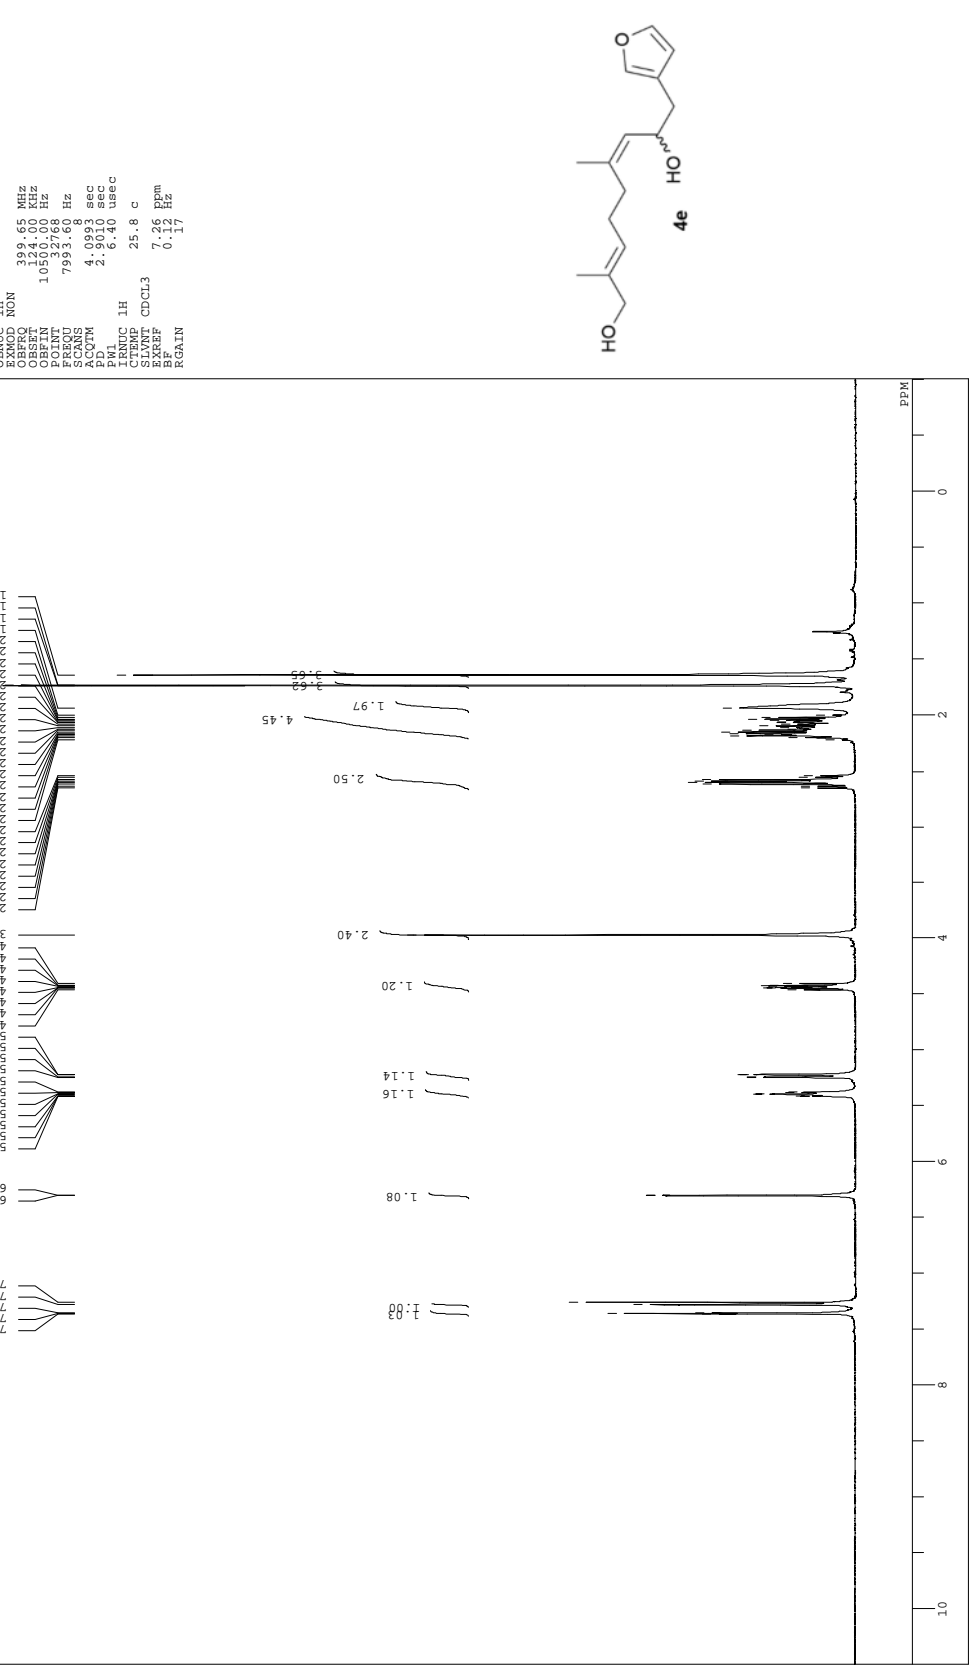

C:\Users\Takamura\Documents\4\2022\terpene-furan\_hybrid\NMR\YK1-53-2\_13C.nls

DFILE YK1-53-2\_13C.nls  
COMPT TUE Oct 16 10:20:20 2018  
ORMC 13C  
EXMOD BCM  
OBSO 100.46 MHz  
PULPROG zgpg30  
OBFTN 10500.00 Hz  
F0 120.70 KHz  
POINT 271.7378 Hz  
SCANS 370  
ACQTM 1.2059 sec  
PRG 1.6240 sec  
PUL 6.240 usec  
IRNMIC LH 27.9 c  
SOLVENT CDCL3  
EXREF BF 77.00 PPM  
BF 2.50 Hz  
RGAIN 24

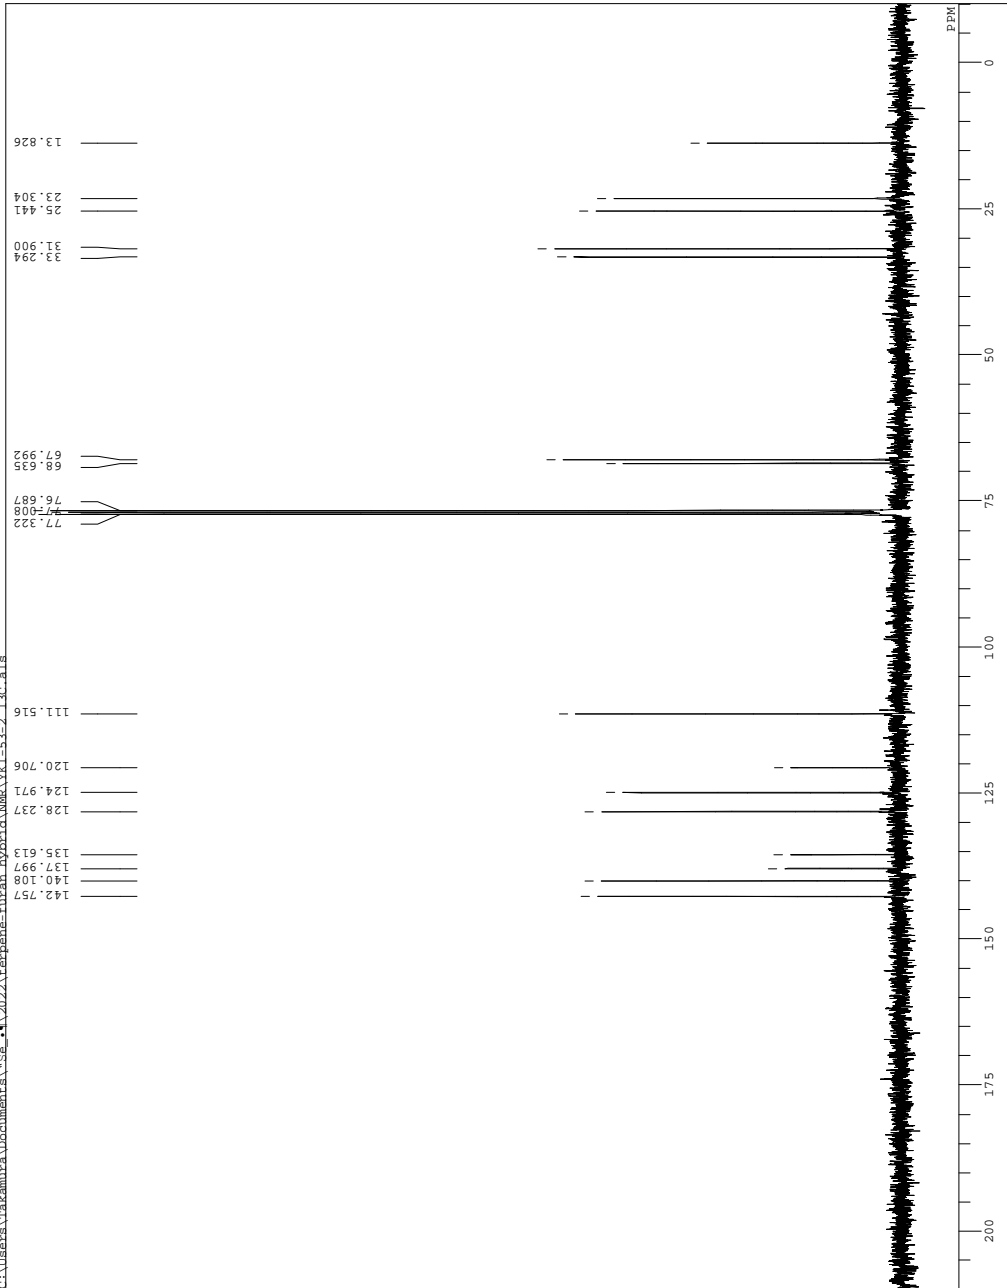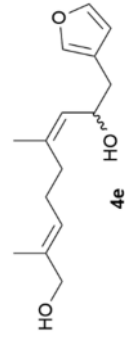

C:\Users\Fukamura\Documents\2022\terpene-furan\_hybrid\NMR\YK1-53-2\_HOF.a1s

DFILE YK1-53-2\_HOF.a1s  
COMPT F1 Oct 05 20:20:49 2018  
NAME F1  
ORNAME F1  
EXMOD DIFNOE  
OBPRO 399.65 MHz  
OBPULP 10.64 Hz  
OBSFQ 10500.00 Hz  
POINT 32768  
SCANS 164  
ACQTM 4.0983 sec  
PD 5.0000 sec  
P1 12.50 usec  
IRNUC 1H 26.0 c  
CTEMP CDCL3 7.26 ppm  
XREF BF 0.12 Hz  
RGAIN 19

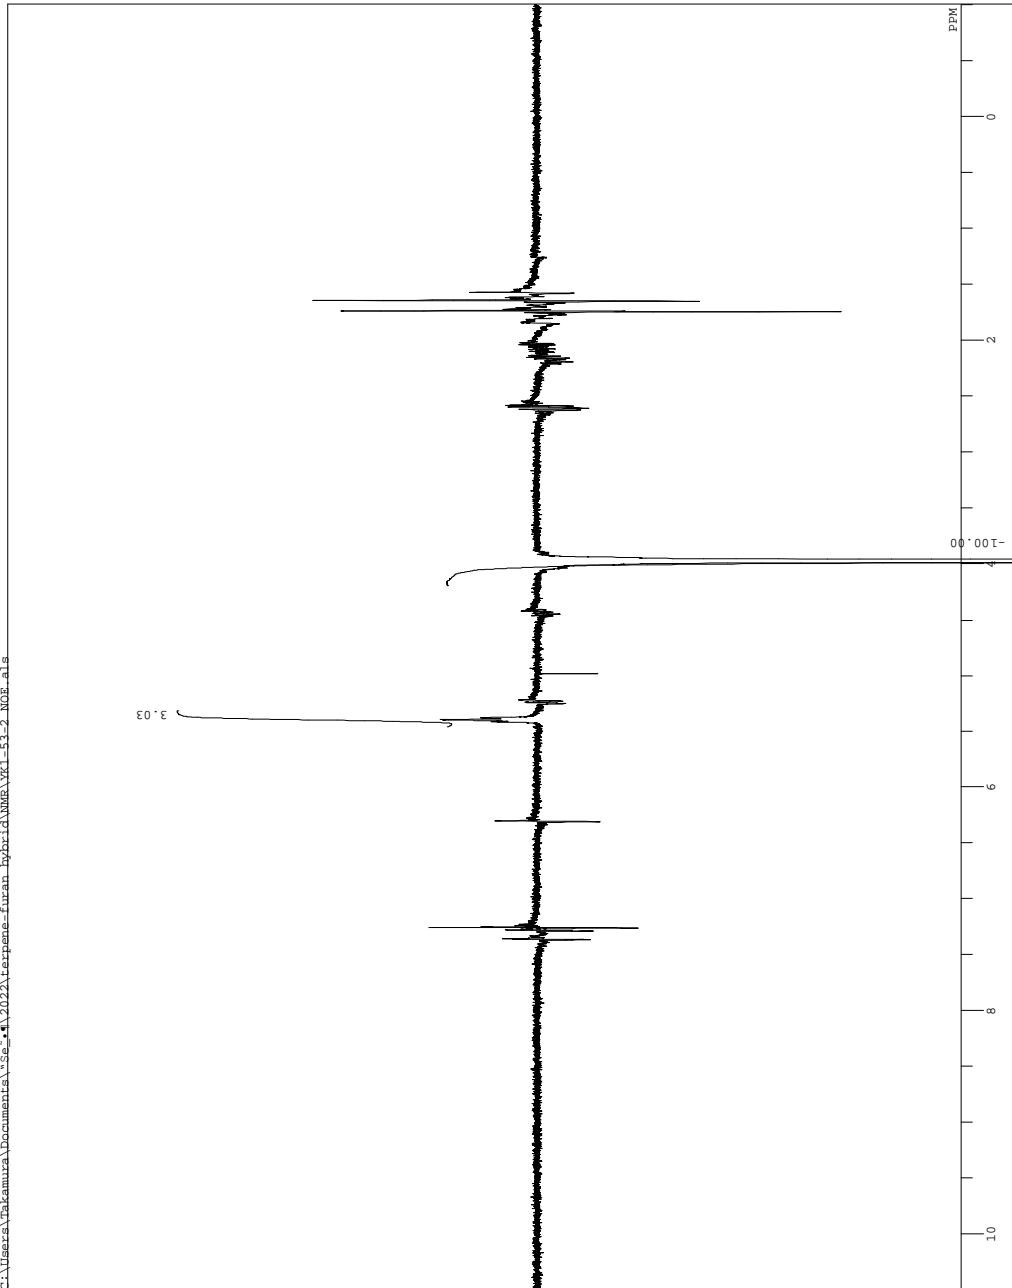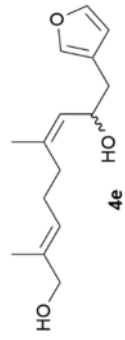

C:\Users\takamura\Documents\2022\karpene-furan-hybrid\NMR\SV-414.a1s

DETE SY-414.a1s  
COMM 2022-12-14 16:53:58  
DATE 2022-12-14 16:53:58  
EXMOD 82pul  
OBFRQ 399.91 MHz  
OBSET 1.00 kHz  
POINT 32768  
FREQU 6410.26 Hz  
CLOCK 30.000 MHz  
ACQON 3.5000 sec  
PD 1.5000 sec  
FID 7.15 usec  
PULPROG zgpg30  
PRGNAME cdc13  
CITEP 37.0 c  
SOLNT cdc13  
SLVNT 7.26 ppm  
RFREF 0.12 Hz  
RGAIN 4.4

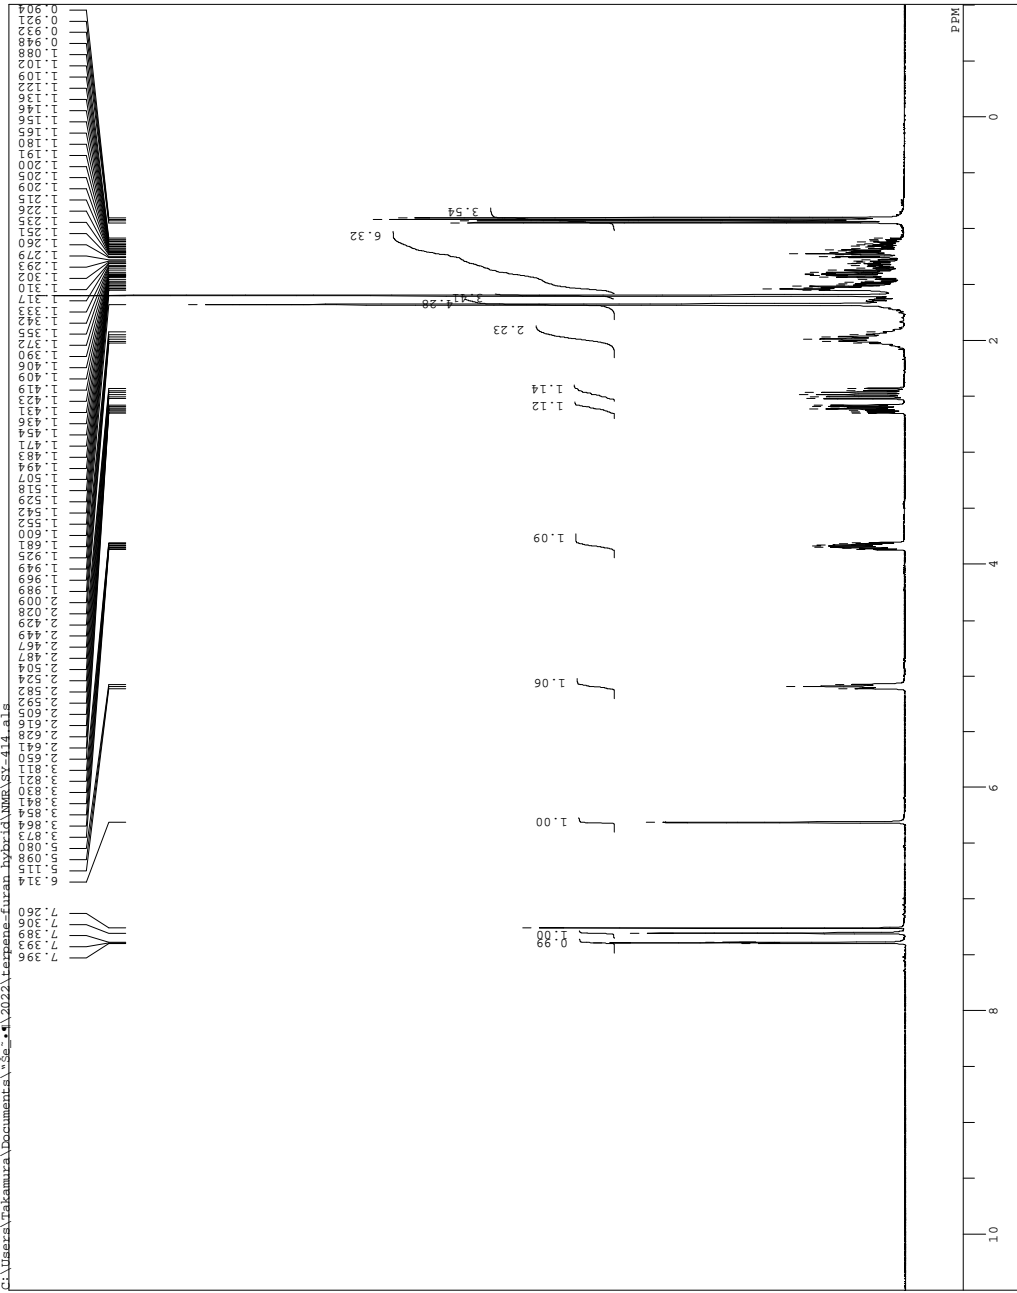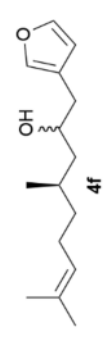



C:\Users\Takamura\Documents\5e\_4\2022\terpene-furan\_hybrid\NMR\VK1-50\_13c\_als

DTLE VK1-50\_13c\_als  
CONT  
DATE Mon Oct 15 11:45:00 2018  
TIME 11:45:00  
EXMOD BCI  
PULSE 100.40 MHz  
OBPRO 1015.00 kHz  
OBSEI 1015.00 kHz  
POINT 32768 Hz  
FREQU 27173.90 Hz  
ACQTM 1.2059 sec  
PD 1.7940 sec  
IRPAC 6.80 usec  
IRPAC 1H 27.9 c  
CTEMP CDCL3 77.00 ppm  
SLVMT BF 2.00 Hz  
RGAIN 25

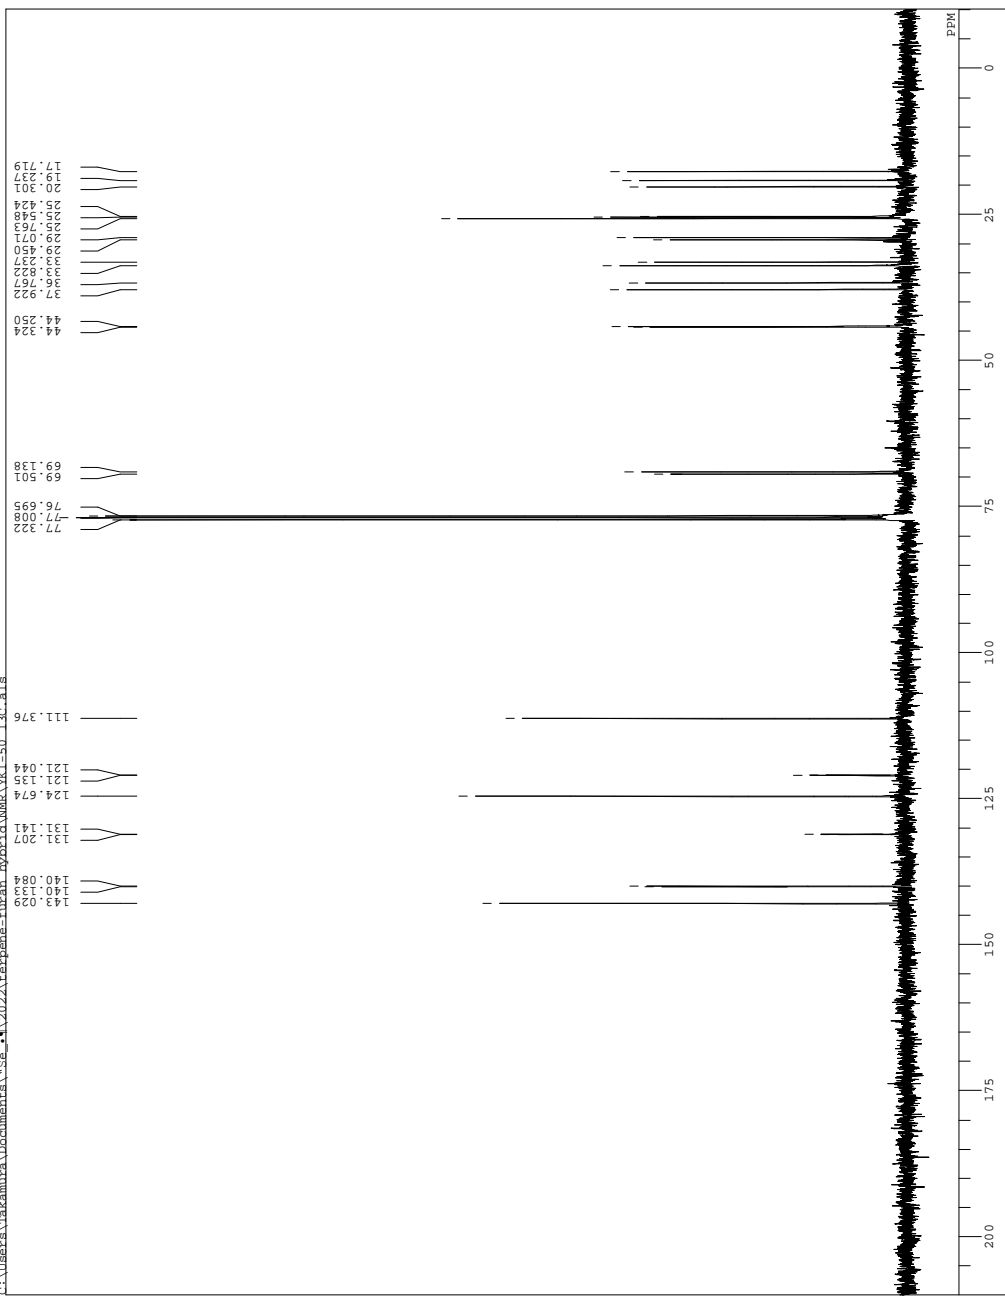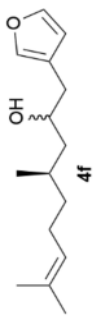

C:\Users\Takamura\Documents\Se-4\2022\terpene-furan\_hybr\NMR\YK1-55-1\_als  
 DFIL YK1-55-3\_als  
 COM1 Wed Oct 17 10:07:55 2018  
 ORMC 1H  
 EXMOD NON  
 OBSST 399.55 MHz  
 OBSF 124.00 KHz  
 OBSFIN 10500.00 Hz  
 POINT 37.68 Hz  
 SCANS 7995.6 Hz  
 ACQTM 4.0993 sec  
 PUL 2.20 usec  
 PM1 2.20 usec  
 IRRUC 1H 25.5 c  
 SUMP CDCL3  
 EXREF 7.26 PPM  
 BF 0.12 Hz  
 RGAIN 14

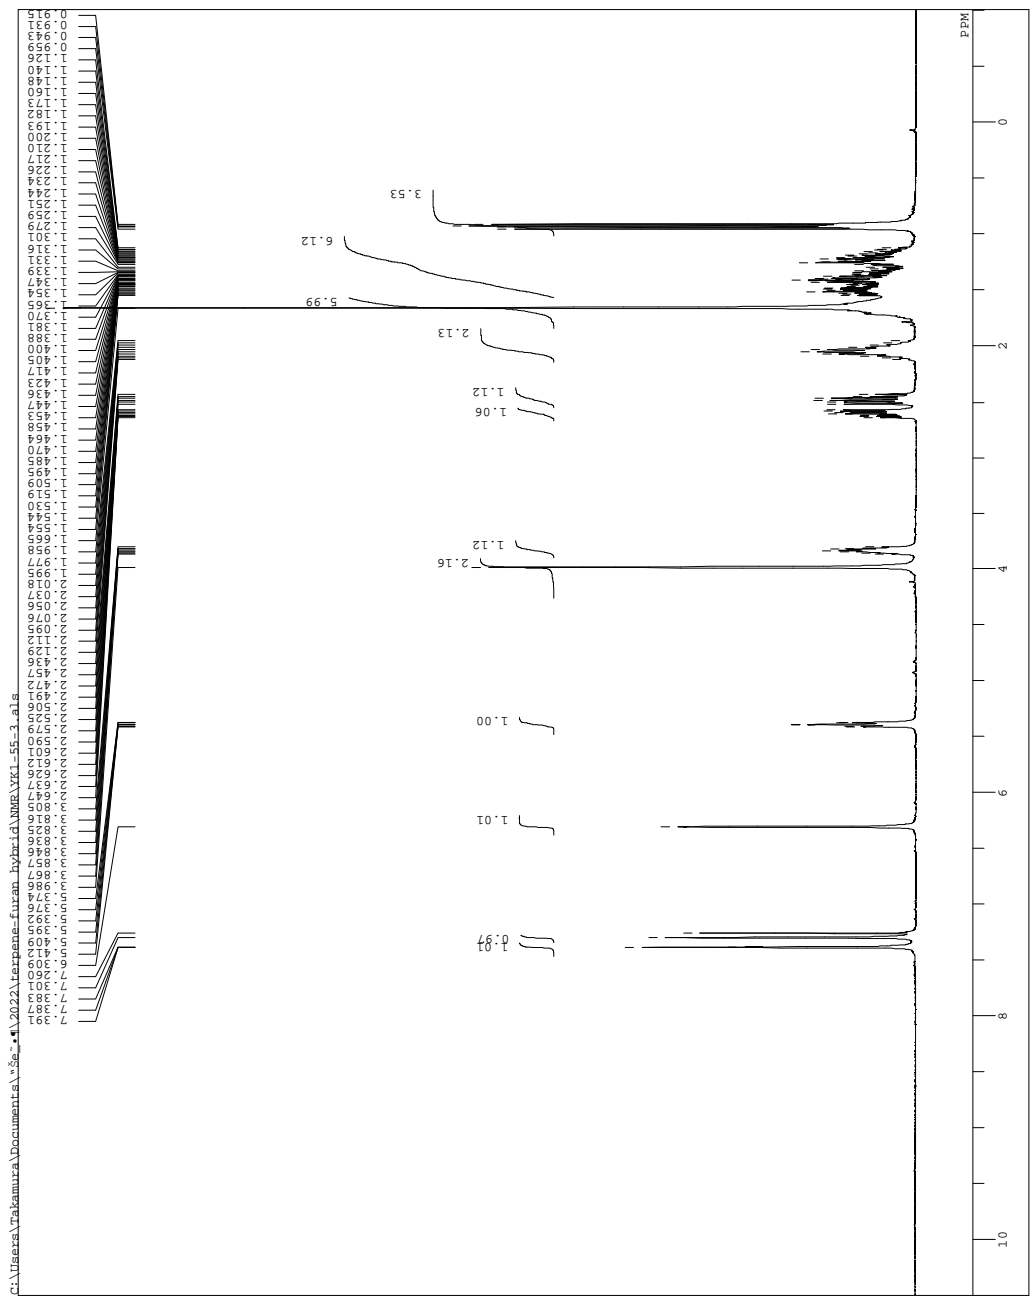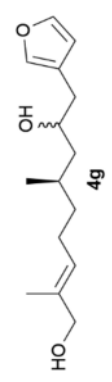

C:\Users\Takamura\Documents\Se\_4\2022\terpene-furan\_hybrid\NMR\YK1-55-3\_13C\_als

DATE YK1-55-3\_13C\_als  
 TIME 9:51  
 DATE Wed Oct 17 10:32:15 2018  
 INSTR 13C  
 PULPROG zgpg30  
 PROCNO 13C  
 AQ 1.00  
 ORFPO BCM  
 OBSFQ 100.40 MHz  
 OBSRT 125.00 KHz  
 PRGNAME 13C-13C  
 DATE\_ 10590708  
 TIME\_ 2713:90 Hz  
 FREQD 2713.90 Hz  
 SCANS 12860  
 SCA1 1.2860 sec  
 SCA2 1.7940 sec  
 SCA3 6.80 usec  
 PULPROG 1H  
 PCYCLE 27.6 c  
 TEMPC 77.00 PPM  
 SOLVENT CDCL3  
 SREF 77.00 Hz  
 AXC 2.24  
 RGAIN

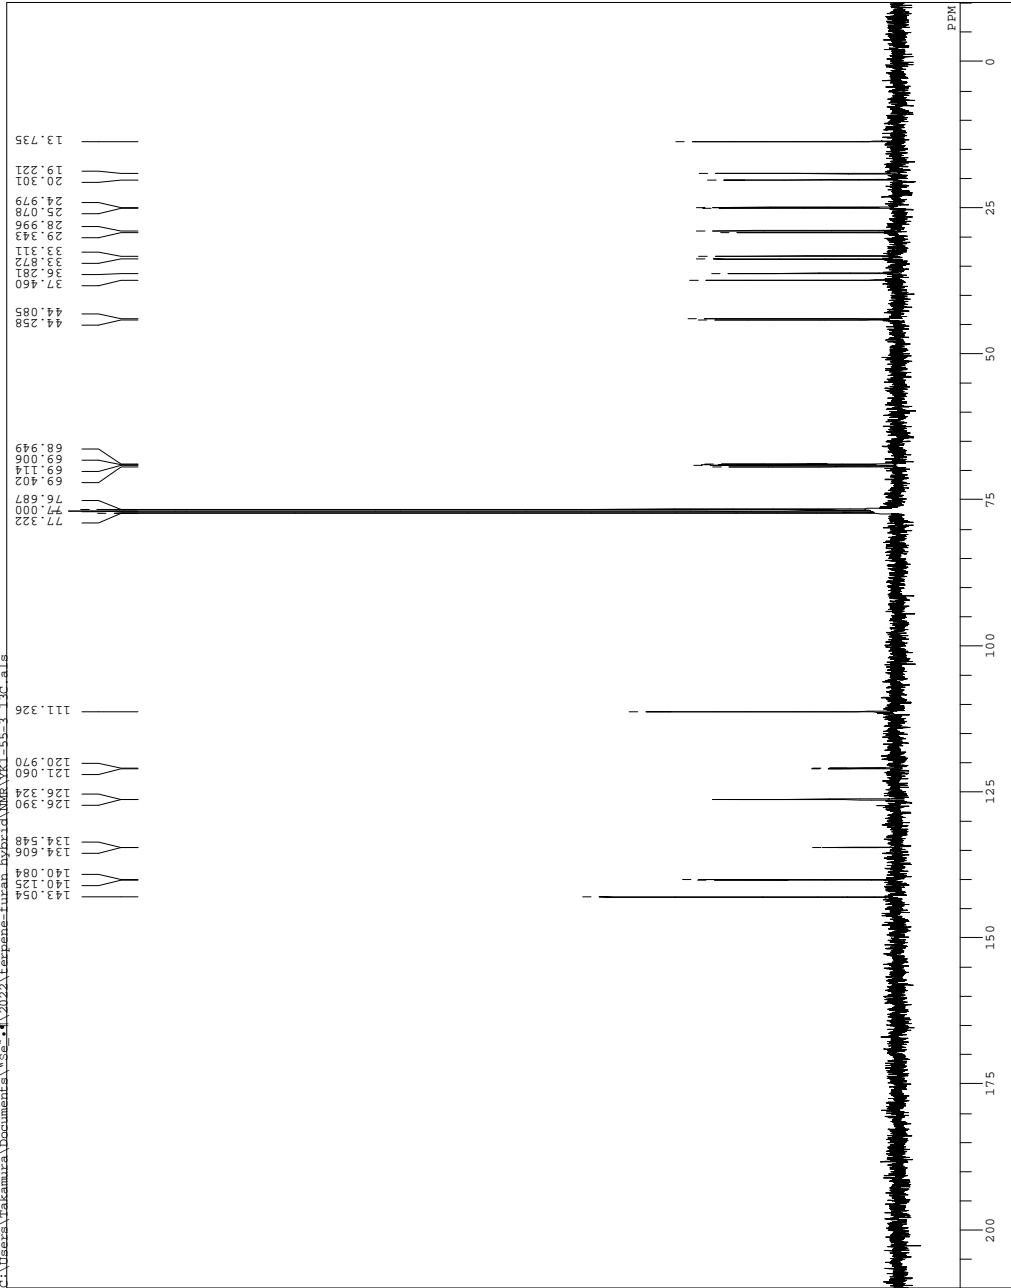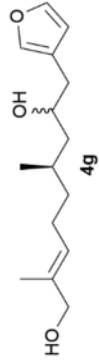

C:\Users\Takahara\Documents\Se\_4\2022\terpene-furan\_hybrid\NMR\YK1-55-3 NOE.als

DFILE YK1-55-3 NOE.als  
DATE\_ TIME Wed Oct 03 20:42:27 2018  
ORNUC 1H  
EXMOD DIFNOE  
PULPROG zgpg30  
OBSF1 399.65 MHz  
OBSF2 134.00 MHz  
PROBHD 5mm QNP 1H/1  
PULPROG 10500.00 Hz  
PCPDPR 79837.60 Hz  
SCANS 4  
AQCTM 4.0093 sec  
DELTA 5.1290 usec  
PWL 1  
IRNUC 1H 26.0 c  
SOLVENT CDCL3 7.26 ppm  
EXREF 0.13 Hz  
RGAIN

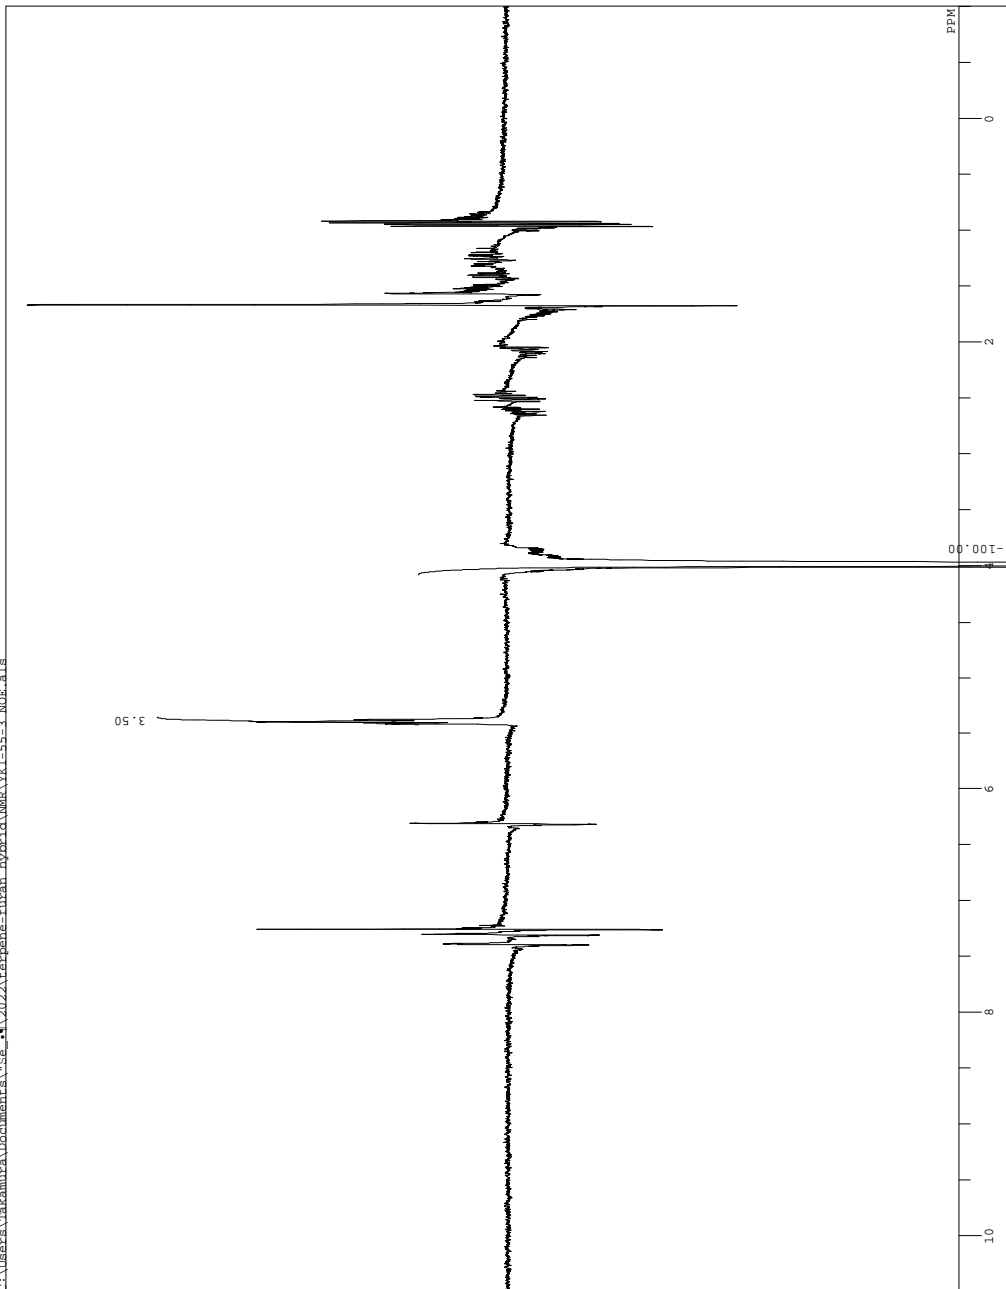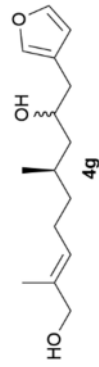

FILE citronellal.als  
NAME citronellal  
DATE\_ TIME 22-11-22 18:40:25  
INSTRUM spect  
PROBHD s2pul  
PULPROG zgpg30  
SFOFF 399.91 MHz  
AQ 1.95 MHz  
RG 2.00 Hz  
EC 32.00 Hz  
PC 6410.00 Hz  
SCANS 32  
AQT 3.5000 sec  
RG 1.7015 sec  
PWL 0.15 sec  
IRNUC 20.0 c  
CLUST 1  
SLVNT cdcl3  
EXREF 7.26 ppm  
BF 0.12 Hz  
RGAIN 40

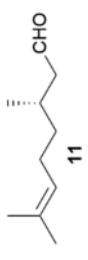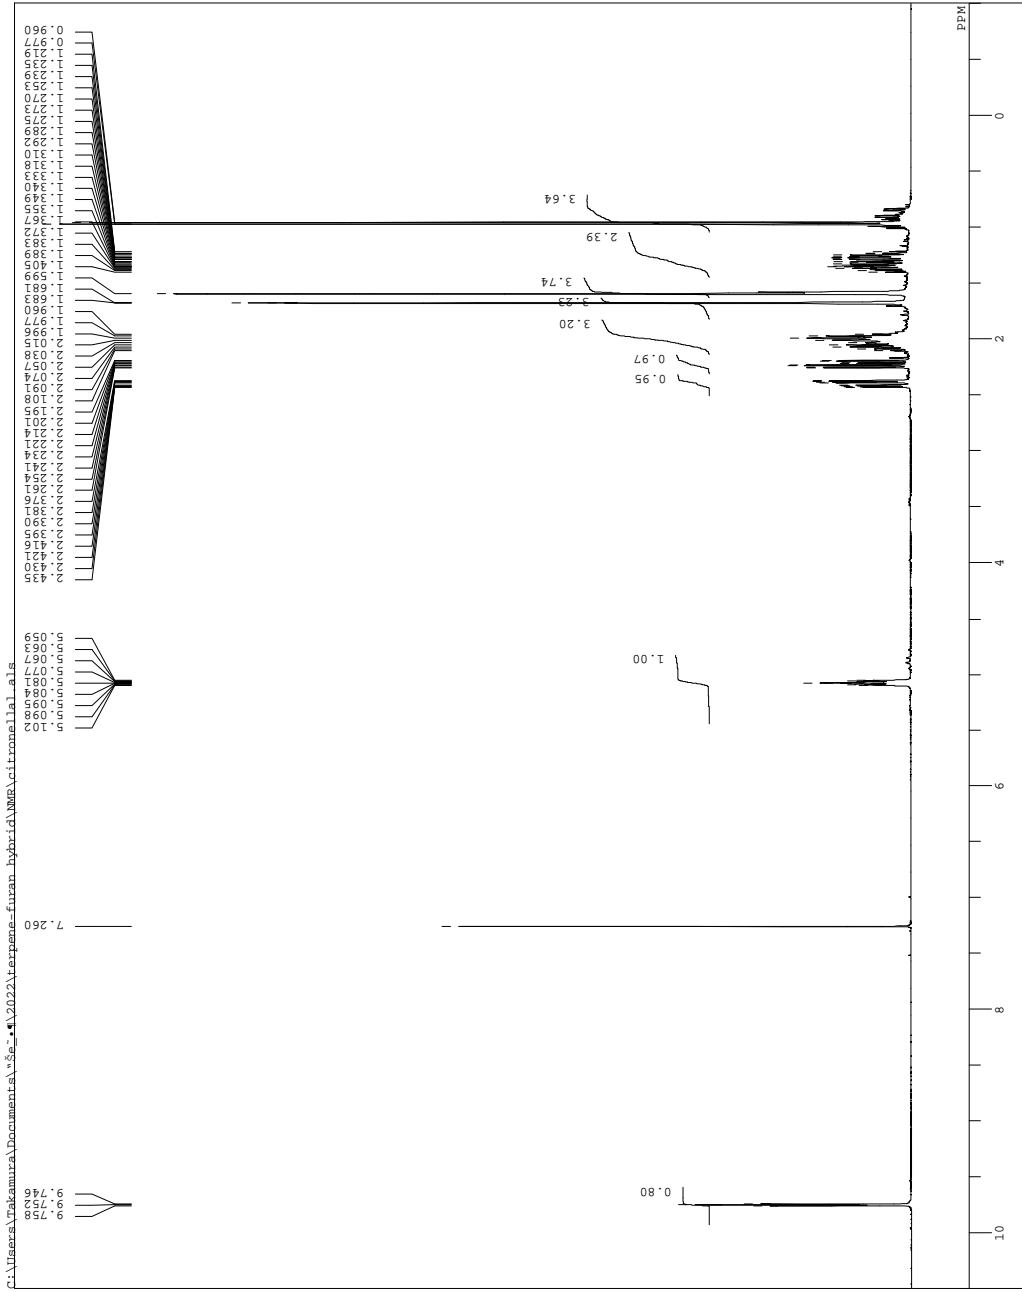

**Figure S1.** Effects of CuSO<sub>4</sub>, geraniol (**1**), (*S*)-citronellol (**10**), furan **12**, and hybrid molecules **4a–4i** on settlement and mortality of cypris larvae.

CuSO<sub>4</sub>, control settlement = 86.1%

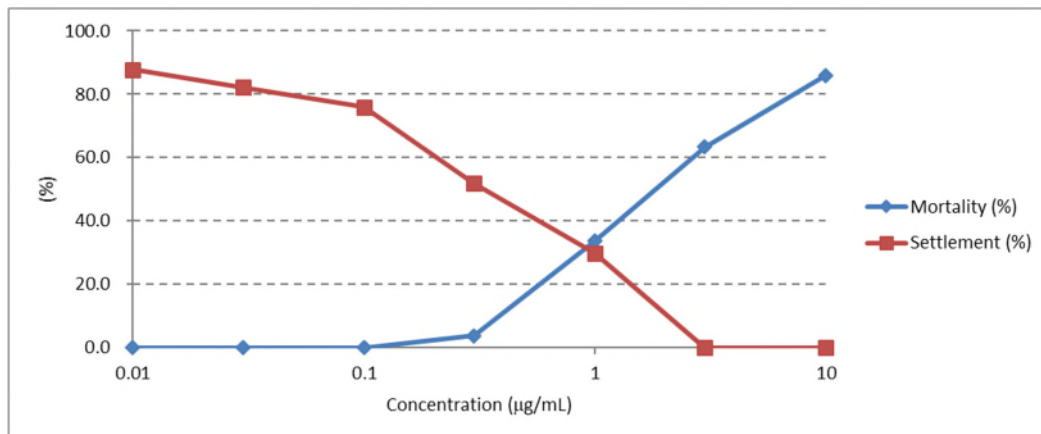

geraniol (**1**), control settlement = 80.0%

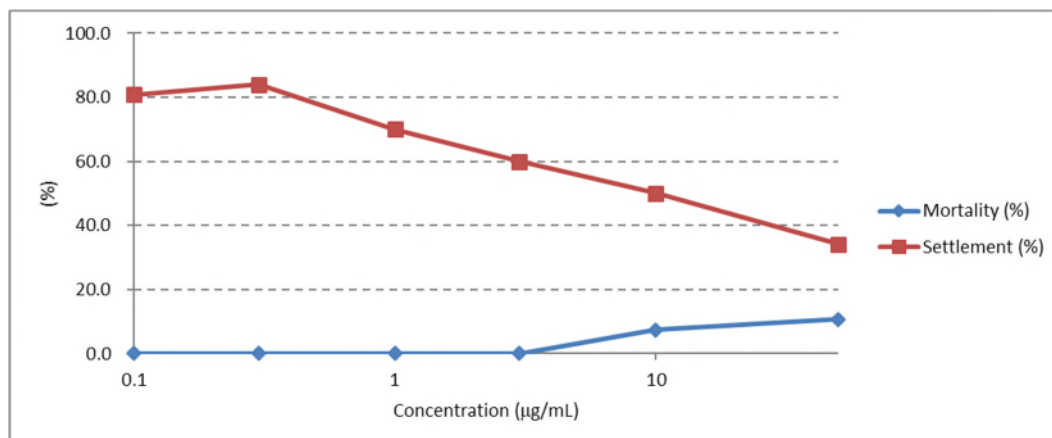

(*S*)-citronellol (**10**), control settlement = 83.0%

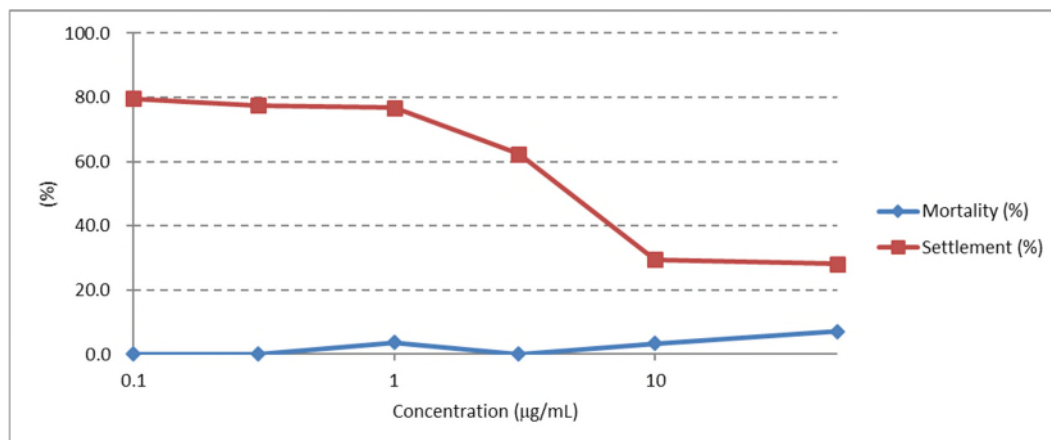

furan 12, control settlement = 79.4%

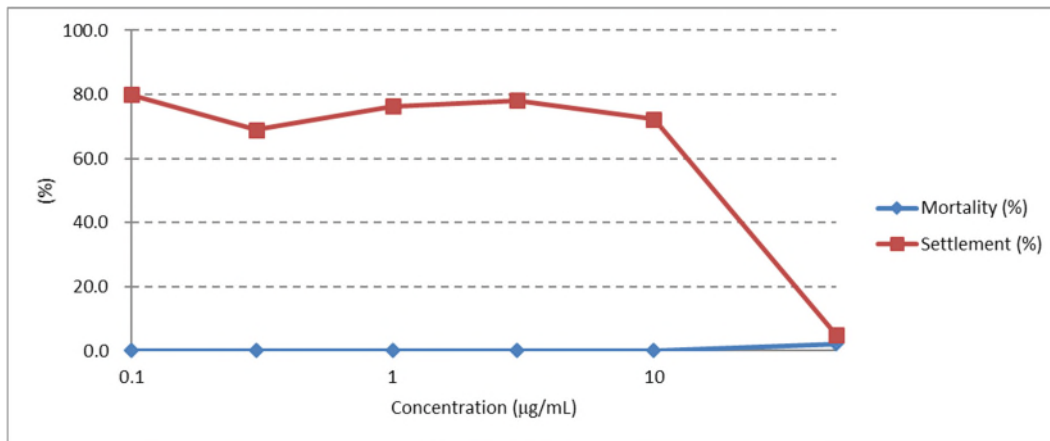

4a, control settlement = 96.3%

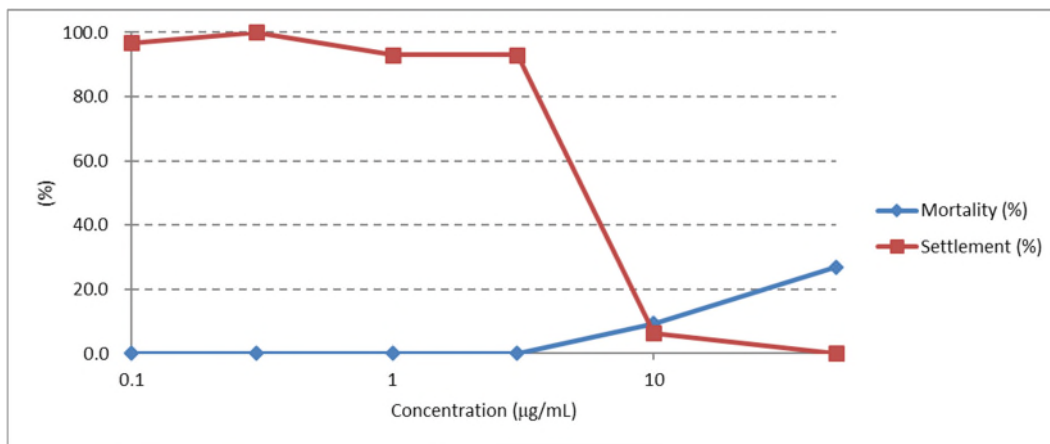

4b, control settlement = 97.2%

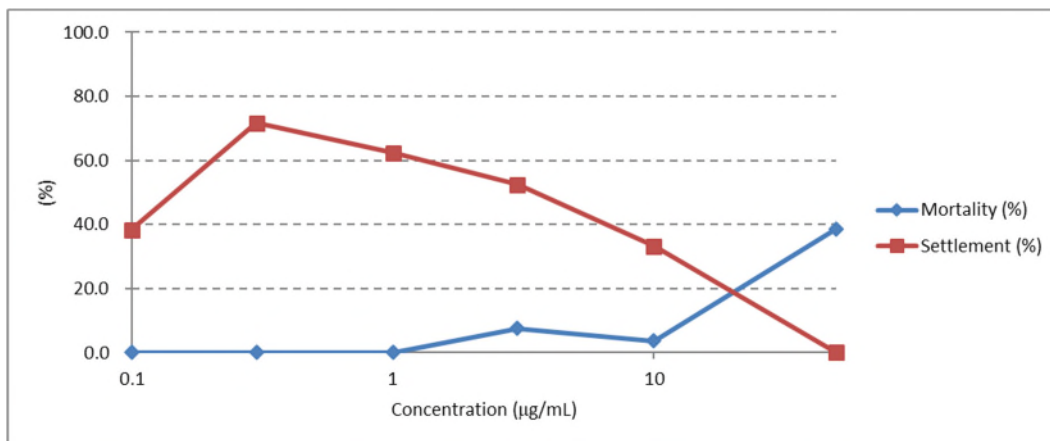

4c, control settlement = 100%

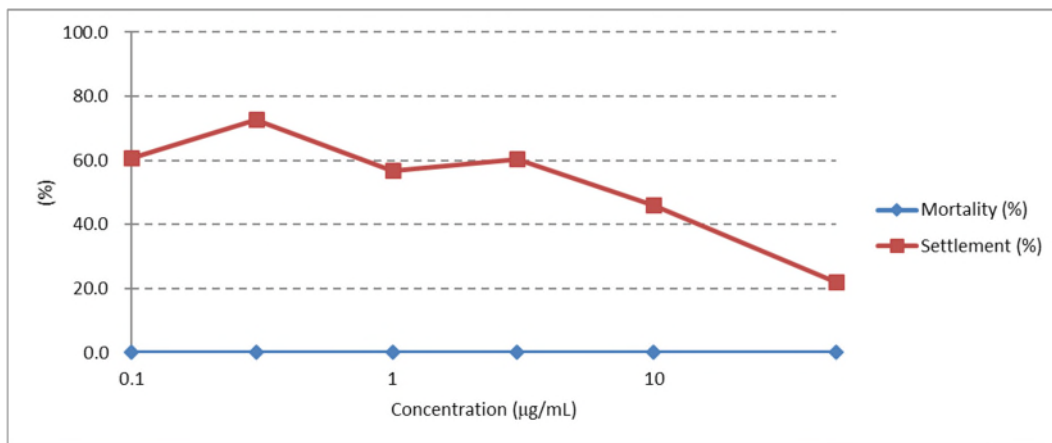

4d, control settlement = 98.3%

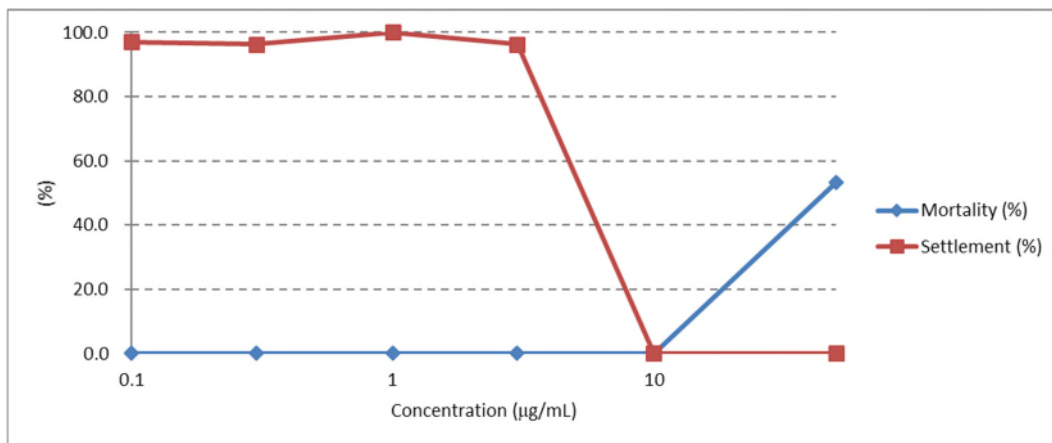

4e, control settlement = 92.0%

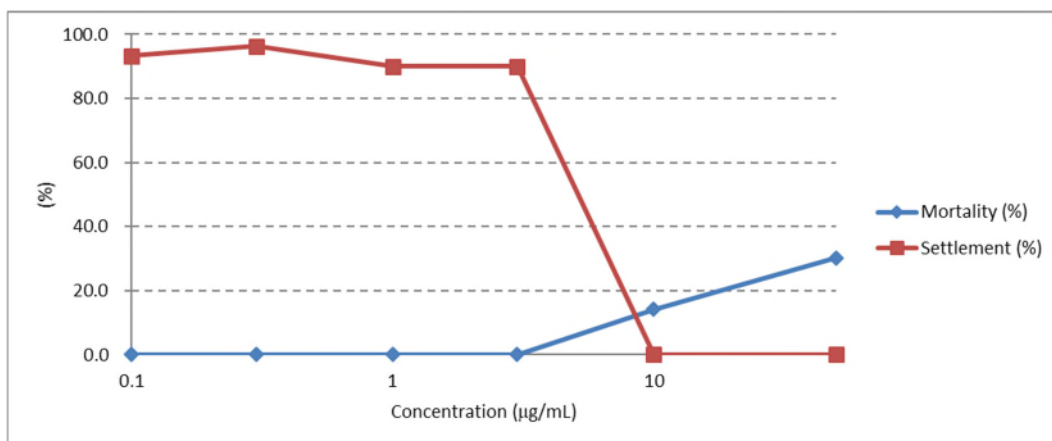



4f, control settlement = 98.3%

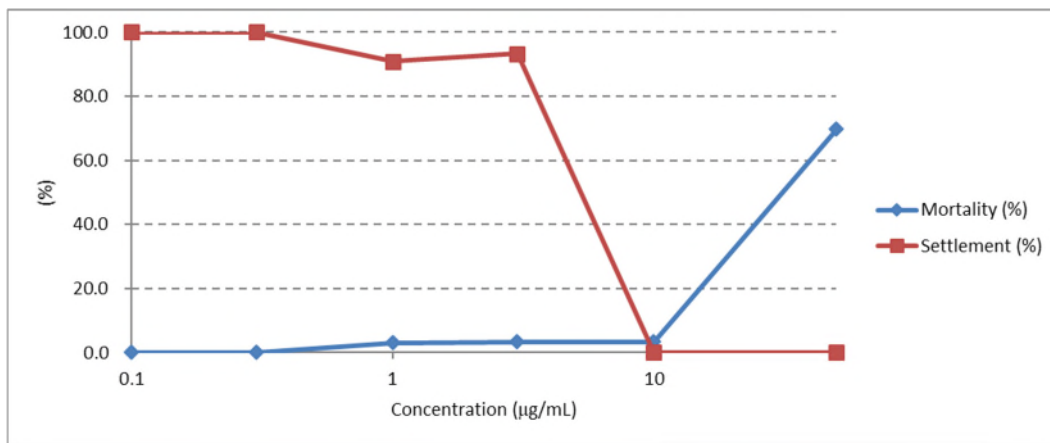

4g, control settlement = 92.0%

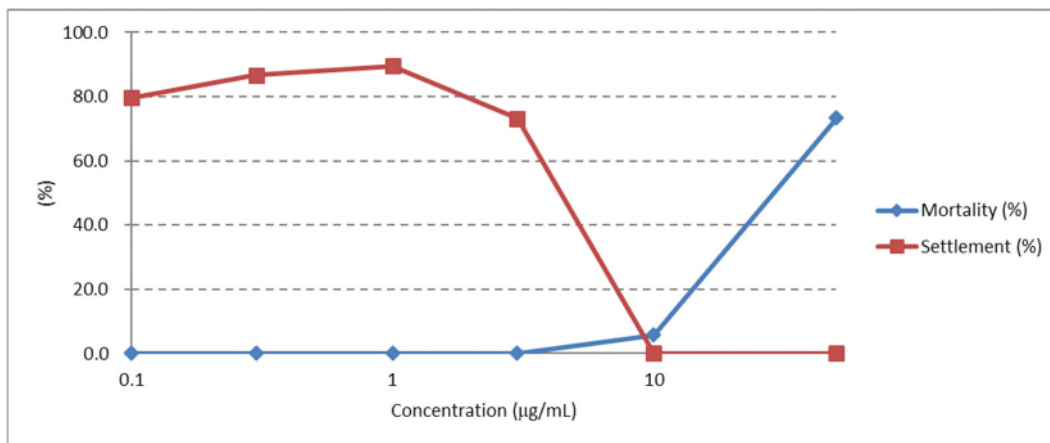

4h, control settlement = 92.0%

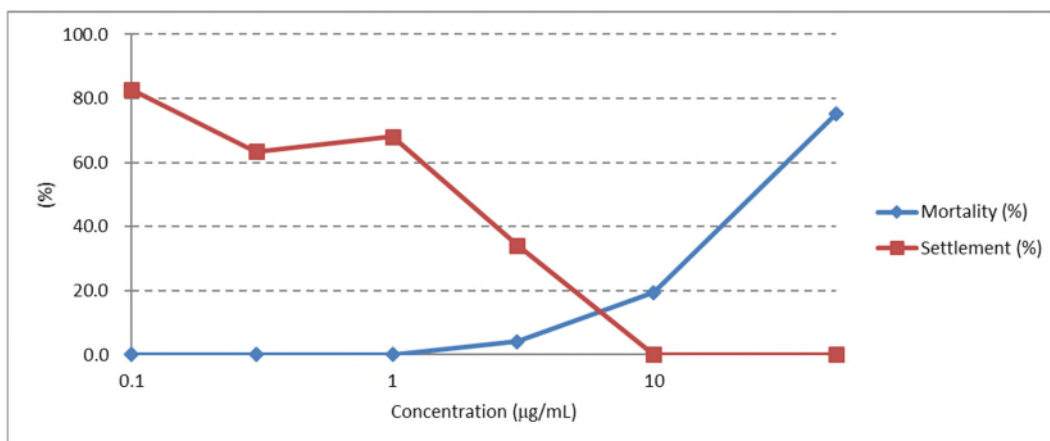

4i, control settlement = 92.0%

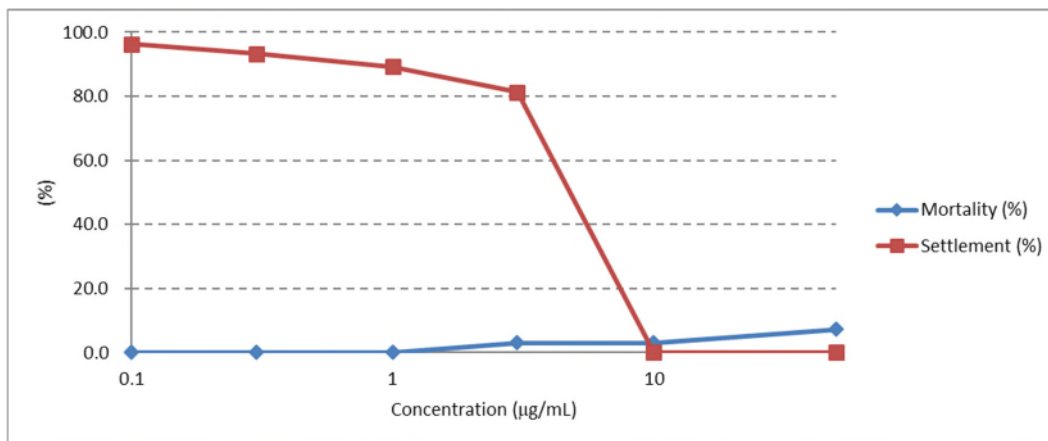

Settlement (%) = (number of settled larvae)/(total number of larvae)\*100

Mortality (%) = (number of died larvae)/ (total number of larvae)\*100

Settlement Inhibition (%) = (control settlement – each settlement)/(control settlement)\*100

Settlement inhibition rates were used in probit analysis.
